1 **SHORT TITLE**

2 Knockout of trichome-regulating MYBs in poplar

3

4 **ARTICLE TITLE**

5 Multiplex knockout of trichome-regulating MYBs in poplar affects light sensitivity and triterpene  
6 accumulation

7

8 **ONE SENTENCE SUMMARY**

9 Non-glandular trichomes in poplar have roles both as a physical barrier and a chemical factory to  
10 mediate plant interactions with the environment.

11

12 **AUTHORS**

13 W. Patrick Bewg<sup>1,2,3</sup>, Scott A. Harding<sup>1,2,3</sup>, Nancy L. Engle<sup>4</sup>, Brajesh N. Vaidya<sup>5,a</sup>, Jingyin Yu<sup>1,b</sup>, Ran Zhou<sup>1,2,3</sup>,  
14 Jacob Reeves<sup>6,c</sup>, Thomas W. Horn<sup>6</sup>, Nirmal Joshee<sup>5</sup>, Jerry W. Jenkins<sup>7,8</sup>, Shengqiang Shu<sup>8</sup>, Kerrie W.  
15 Barry<sup>8</sup>, Yuko Yoshinaga<sup>8</sup>, Jane Grimwood<sup>7,8</sup>, Robert J. Schmitz<sup>2</sup>, Jeremy Schmutz<sup>7,8</sup>, Timothy J.  
16 Tschaplinski<sup>4</sup>, and Chung-Jui Tsai<sup>1,2,3\*</sup>

17 <sup>1</sup> School of Forestry and Natural Resources, University of Georgia, Athens, Georgia, 30602, USA

18 <sup>2</sup> Department of Genetics, University of Georgia, Athens, Georgia, 30602, USA

19 <sup>3</sup> Department of Plant Biology, University of Georgia, Athens, Georgia, 30602, USA

20 <sup>4</sup> Oak Ridge National Laboratory, Oak Ridge, Tennessee, 37830, USA

21 <sup>5</sup> Fort Valley State University, Fort Valley, Georgia, 31030, USA

22 <sup>6</sup> Department of Computer Science, University of Georgia, Athens, Georgia, 30602, USA

23 <sup>7</sup> HudsonAlpha Institute for Biotechnology, Huntsville, Alabama, 35806, USA

24 <sup>8</sup> U.S. Department of Energy Joint Genome Institute, Berkeley, California, 94720, USA

25 \*Senior author and author for correspondence: [cjtsai@uga.edu](mailto:cjtsai@uga.edu) (C.-J.T.)

26 <sup>a</sup> Present address: GreenVenus, LLC, Wimauma, Florida 33598, USA

27 <sup>b</sup> Present address: Boyce Thompson Institute, Cornell University, Ithaca, New York 14853, USA

28 <sup>c</sup> Present address: SoundHound Inc., Boulder, Colorado 80302, USA

29

30 The author responsible for distribution of materials integral to the findings presented in this article in  
31 accordance with the policy described in the Instructions for Authors is Chung-Jui Tsai ([cjtsai@uga.edu](mailto:cjtsai@uga.edu)).

32

33 **AUTHOR CONTRIBUTIONS**

34 C.-J.T. and W.P.B. conceived the study and designed the experiments; W.P.B. performed all experiments  
35 and analyzed data; S.A.H. provided guidance on physiological and metabolic analyses; J.Y., J.R., T.W.H,  
36 and R.Z. provided bioinformatic support; B.N.V. and N.J. performed SEM analysis; J.J., K.B., R.J.S., Y.Y.,  
37 S.S., J.G. and J.S. contributed the *Populus tremula* x *P. alba* INRA 717-1B4 draft genome; N.L.E. and T.J.T.  
38 performed wax compositional analysis; W.P.B. wrote the manuscript, C.-J.T. revised the manuscript with  
39 input from S.A.H.

40

41

42 **FUNDING**

43 The work was funded in part by The Center for Bioenergy Innovation, a U.S. Department of Energy  
44 Research Center supported by the Office of Biological and Environmental Research in the DOE Office of  
45 Science, the Division of Integrative Organismal Systems (grant nos. IOS-1546867) of the National Science  
46 Foundation, the Community Science Program of the Joint Genome Institute, a DOE Office of Science  
47 User Facility. The work conducted by the U.S. Department of Energy Joint Genome Institute is supported  
48 by the Office of Science of the U.S. Department of Energy under Contract No DE-AC02-05CH11231.

49

50

51 **Keywords:** multiplex editing, gene duplication, triterpenes, sterol, glabrous, genomic dropout

52

53

54

55

56

57

58

59

60

61

62

63

64

65 **ABSTRACT**

66

67 Hair-like trichomes cover the aerial organs of many plant species and act as a barrier between a plant  
68 and its environment. They function in defense against biotic and abiotic stresses, while also serving as  
69 sites for synthesis and storage of secondary metabolites. Previously, the transcription factor *PtaMYB186*  
70 was identified as a positive regulator of trichome initiation during early stages of leaf development in  
71 *Populus tremula* x *P. alba* (IRNA 717-1B4). However, trichome regulation in poplar remains largely  
72 unexplored, as does the functional redundancy of duplicated poplar genes. Here, we employed  
73 CRISPR/Cas9 to target a consensus region of *PtaMYB186* and its close paralogs for knockout.  
74 Regeneration of glabrous mutants suggested their essential roles in poplar trichome development. No  
75 apparent differences in growth and leaf transpiration rates between the mutants and the controls were  
76 observed, but trichomeless poplars showed increased insect pest susceptibility. RNA-seq analysis  
77 revealed widespread down-regulation of circadian- and light-responsive genes in the mutants. When  
78 exposed to a high light regime, trichomeless mutants accumulated significantly higher levels of  
79 photoprotective anthocyanins. Cuticular wax and whole leaf analyses showed a complete absence of  
80 triterpenes in the mutants, suggesting biosynthesis and storage of triterpenes in poplar occurs in the  
81 non-glandular trichomes. This work also demonstrates that a single gRNA with SNP-aware design is  
82 sufficient for multiplex targeting of paralogous genes in outcrossing and/or hybrid species with  
83 unexpected copy number variations.

84

85

86

87

88

89

90

91

92

93

94

95

96

97 **INTRODUCTION**

98

99 Trichomes are modified epidermal cells giving a hair-like appearance to the aerial surfaces of shoot  
100 organs throughout the Plantae kingdom. The abundance and morphological diversity of trichomes  
101 reflect their multifunctionality, including protection against feeding insects, excessive transpiration, and  
102 UV radiation (Schuepp, 1993; Bickford, 2016). Trichomes can be subclassified as unicellular or  
103 multicellular, branched or unbranched, and glandular or non-glandular (Payne, 1978). Glandular  
104 trichomes are known for their ability to synthesize, store and secrete large quantities of specialized  
105 metabolites, especially terpenoids, some with insecticidal or pharmaceutical properties (Schuurink and  
106 Tissier, 2020). Non-glandular trichomes, on the other hand, are present in a wide range of plant taxa,  
107 including *Arabidopsis* and *Populus* spp., and are known to synthesize and store predominantly phenolics  
108 but do not possess secretory abilities (Karabourniotis et al., 2020).

109

110 Trichome initiation and development are under strict spatiotemporal regulation (Larkin et al., 2003;  
111 Hülskamp, 2004). Despite trichome diversity, the main molecular and hormonal pathways governing  
112 their development appear conserved in angiosperms (Fambrini and Pugliesi, 2019). For instance,  
113 exogenous jasmonic acid (JA), cytokinin and gibberellin (GA) applications promote trichome initiation of  
114 both unicellular (*e.g.*, *A. thaliana*) and multicellular (*e.g.*, *Medicago truncatula* and *P. trichocarpa*) types  
115 (Maes and Goossens, 2010). The phytohormonal actions are mediated in part through the “MBW”  
116 transcription activation complex, consisting of interacting R2R3-MYB and bHLH (basic helix-loop-helix)  
117 transcription factors on a WD40 repeat protein scaffold (Maes et al., 2008; Zhao et al., 2008). The MBW  
118 complex modulates not only trichome development but also several other traits, including root hair  
119 patterning and anthocyanin biosynthesis (Wang and Chen, 2014; Fambrini and Pugliesi, 2019). In  
120 *Arabidopsis*, the single-copy WD40 protein TTG1 (TRANSPARENT TESTA GLABRA1) is involved in all  
121 MBW-mediated processes (Walker et al., 1999), whereas three bHLHs participate in a partially  
122 redundant manner (Zhang et al., 2003). MYB, on the other hand, is the most discriminating component  
123 of the complex, with structurally distinct R2R3-MYB and R3-MYB members competing for bHLH binding  
124 to promote or inhibit trichome development, respectively (Wang and Chen, 2014). Even among R2R3-  
125 MYBs, functional specialization is evident such that constitutive expression of anthocyanin-associated  
126 MYBs cannot phenotypically rescue the *Arabidopsis glabrous1 (gl1)* mutant and vice versa (Zhang and  
127 Hülskamp, 2019).

128

129 Previously, activation-tagging has identified *PtaMYB186* as a positive regulator of trichome development  
130 in *Populus tremula* x *P. alba* INRA 717-1B4, hereon referred to as 717 (Plett et al., 2010). *PtaMYB186* is  
131 orthologous to Arabidopsis *AtMYB106* whose loss-of-function mutations result in mutants (*noeck* or  
132 *nok*) with glassy and highly branched trichomes (Folkers et al., 1997). Initially proposed to function in  
133 negative regulation of epidermal outgrowth and trichome branching (Jakoby et al., 2008; Gilding and  
134 Marks, 2010), *AtMYB106* and its paralogous *AtMYB16* were later found to also regulate cuticle  
135 development and wax crystal accumulation in Arabidopsis (Oshima et al., 2013). The *Antirrhinum majus*  
136 ortholog *AmMIXTA* controls epidermal conical cell formation in petals and promotes multicellular  
137 trichome development when overexpressed in tobacco (*Nicotiana tabacum*) (Glover et al., 1998). A  
138 similar role was reported for the cotton (*Gossypium hirsutum* L.) ortholog *GhMYB25* which regulates  
139 specialized epidermal cell outgrowth of trichome and cotton fibers (Machado et al., 2009). These results  
140 underscore both pleiotropic and specialized functions of MYBs in diverse epidermal cell developmental  
141 programs both within and across species.

142

143 In the case of poplar, *PtaMYB186* corresponds to gene model Potri.008G089200 in the *P. trichocarpa* v3  
144 genome. It belongs to clade 15 of the R2R3-MYB protein family tree (Wilkins et al., 2009), which also  
145 includes *AtMYB106* and *AtMYB26*, but is distinct from the other trichome-related MYBs (*AtGL1* and  
146 *AtMYB23*) in clade 45. Clade 15 is expanded in poplar and contains three additional members, *MYB138*,  
147 *MYB38* and *MYB83*, with as yet unclear functions (Plett et al., 2010). The current research employed  
148 CRISPR/Cas9 to knock out (KO) *PtaMYB186* and its close paralogs, *PtaMYB138* and *PtaMYB38* in poplar  
149 717. Analysis of the resulting glabrous mutants substantiates their essential involvement in poplar  
150 trichome development. Plant growth, physiology, transcriptome and metabolite data were synthesized  
151 to infer trichome functions in poplar. We also discuss technical findings associated with CRISPR editing  
152 of duplicated genes.

153

154

155

156

157

158

159

160

161 **RESULTS**

162

163 **Multiplex CRISPR/Cas9 editing of trichome-regulating MYBs**

164 The four *P. trichocarpa* MYB genes in clade 15 are derived from multiple duplication events, including an  
165 ancient (gamma) whole genome duplication (*MYB186* and *MYB83*), a Salicoid duplication (*MYB186* and  
166 *MYB38*), and a tandem duplication (*MYB186* and *MYB138*) (Figure 1). *MYB186*, *MYB138* and *MYB38*  
167 share higher levels (88-96%) of amino acid sequence similarity than with *MYB83* (55-57%). To ascertain  
168 these MYB involvement in trichome development, we mined RNA-seq data from different stages of 717  
169 leaf development. Transcript levels of *MYB186*, *MYB138* and *MYB38* were highest in newly emerged  
170 leaves (Leaf Plastochron Index LPI-1) when trichome initiation occurs (Plett et al., 2010), but quickly  
171 declined thereafter in expanding (LPI-5) and mature (LPI-15) leaves (Figure 1). In contrast, *MYB83*  
172 transcripts were detected throughout leaf maturation (Figure 1), weakening support for its potential  
173 involvement in trichome development.

174

175 We designed a single gRNA to target a conserved region in exon two of *MYB186*, *MYB138* and *MYB38*  
176 (Figure 2A) based on the *P. trichocarpa* v3.0 reference genome and cross-checked using the 717 variant  
177 database (Xue et al., 2015; Zhou et al., 2015) to assure the gRNA target sites were SNP-free in 717. Two  
178 CRISPR/Cas9 constructs were generated (see Methods); the first erroneously omitted a guanine  
179 between the gRNA and the scaffold sequences (referred to as  $\Delta G$ , Figure 2B), which was corrected in the  
180 second construct (Figure 2A). Both constructs were used for 717 transformation in order to learn  
181 whether  $\Delta G$  would affect CRISPR/Cas9 editing. In total, 28 independent events generated from the  $\Delta G$   
182 construct were all phenotypically indistinguishable from the wild type (WT) and Cas9-only controls  
183 (Figure 2C-J). In contrast, 37 independent events generated from the correct KO construct were glabrous  
184 (Figure 2N-R), and one single event (KO-27) had a greatly reduced number of trichomes (Figure 2K-M).  
185 SEM imaging revealed no trichome initiation or development on the abaxial leaf surface of the glabrous  
186 mutants (Figure 2Q). Epidermal cell morphology of young leaves from tissue cultured plants did not  
187 differ between control and mutant genotypes on either their abaxial (Figure 2F, N) or adaxial surfaces  
188 (Figure 2J, R). These results are consistent with roles for *MYB186* (Plett et al., 2010) and its paralogs  
189 *MYB138* and *MYB38* in trichome initiation and development.

190

191 **Mutation spectrum of duplicated 717 MYB alleles**

192 A random selection of 30 glabrous KO events, 28  $\Delta$ G events, two Cas9-only events and four WT plants  
193 were subject to amplicon deep-sequencing using consensus primers for *MYB186*, *MYB138* and *MYB38*.  
194 Initial analysis by AGESeq (Xue and Tsai, 2015) showed numerous chimeric edits (mix of edited and  
195 unedited sequences at a given site) not observed in other CRISPR/Cas9-edited 717 transgenics in our  
196 experience (Zhou et al., 2015; Bewg et al., 2018). *De novo* assembly of amplicon reads from control  
197 samples revealed seven distinct sequences, more than the expected six alleles of the three target genes.  
198 Blast search against the preliminary 717 genome assemblies by the Joint Genome Institute uncovered an  
199 unexpected copy number variation in 717 relative to the *P. trichocarpa* reference genome. The region  
200 containing paralogous *MYB186* and *MYB138* on Chromosome (Chr) 8 is found as a tandem duplicate in  
201 one of the 717 subgenomes (Figure 3A). This results in three alleles each for *MYB186* and *MYB138* (two  
202 on the main subgenome [Chr8m] and one on the alternative subgenome [Chr8a]) and two alleles for  
203 *MYB38* on Chr10 (Chr10m and Chr10a, Figure 3A). Two of the eight alleles were identical in the amplicon  
204 region, explaining the seven distinct sequences we recovered from *de novo* assembly. Based on the 717  
205 assemblies, we redesigned primers to ensure the amplicons span allele-specific SNP(s) to aid mutation  
206 pattern determination of the eight alleles.

207  
208 Amplicon-sequencing showed no editing in the 28  $\Delta$ G events, except one ( $\Delta$ G-24) with a 9 bp deletion at  
209 one of the eight target sites (Dataset S1). This translates into a mutation rate of 0.45% (one out of 224  
210 potential target sites), which suggests a negative effect of the  $\Delta$ G on CRISPR/Cas9 function (hereafter,  
211 the  $\Delta$ G plants were treated as transformation controls). In contrast, we confirmed successful editing  
212 across the eight alleles in all glabrous mutants except KO-27 (Figure 3B, Dataset S1). This event showed  
213 six edited and two intact (unedited) alleles, consistent with trichome detection in this line (Figure 2K-M).  
214 In aggregate, small insertions and deletions (indels) were the predominant edits at all sites (Figure 3B-C),  
215 with frameshift deletions of 1 bp (-1), 2 bp (-2) and 4 bp (-4) accounting for over three quarters of the  
216 indel mutations (Figure 3C). In-frame deletions (-3 or -6) accounted for 10% of indels and were detected  
217 in 14 events, including KO-27 (Figure 3B-C). These in-frame mutations are unlikely functional because  
218 the gRNA target site is located within the third  $\alpha$ -helix of the R2 domain critical for MYB-DNA interaction  
219 (Wang et al., 2020), and because 13 of the events with in-frame mutations are glabrous. We therefore  
220 conclude that all small indels we detected are null mutations.

221  
222 The vast majority (80%) of the mutants also harbored potentially large deletions as evidenced by the  
223 dearth of mapped amplicon reads at the target sites, referred to as no-amplification (NA) alleles (Figure

224 3B-C). The NA frequencies differed by chromosome position and were positively correlated with copy  
225 number, being highest at the Chr8m site (four tandem copies), followed by the Chr8a site (two tandem  
226 copies) and least at the single-copy Chr10 sites (Figure 3A-B). The NA alleles on Chr8 often spanned  
227 consecutive copies, suggesting large dropouts between two gRNA cleavage sites. To support this idea,  
228 we examined a subset of mutant lines using allele-specific primers for PCR amplification of the target  
229 genes (Figure S1). As expected, NA alleles yielded no PCR products, whereas alleles previously detected  
230 by amplicon sequencing produced observable PCR products (Figure S1). We next used consensus  
231 primers for PCR amplification of all six Chr8 (*MYB186* and *MYB138*) alleles, approximately 850 – 950 bp,  
232 from three control plants and four KO lines each with 4-5 NA alleles on Chr8. These KO lines had reduced  
233 PCR band intensity when compared with controls (Figure 3D). Sanger sequencing of the PCR products  
234 resulted in clean chromatograms with clear nucleotide peaks throughout the sequenced length for KO-5  
235 and KO-69 (Figure 3E), two mutant lines with only one detectable Chr8 allele (Figure 3B). In contrast, the  
236 chromatograms for KO-63, KO-70 (both containing two detectable Chr8 alleles) and WT samples were  
237 noisy as would be expected for mixed template (Figure 3E). The Sanger sequencing data of KO-5 and KO-  
238 69 not only confirmed the indel pattern (-2 in both cases) detected by amplicon sequencing, but also  
239 supported the occurrence of gene fusion between two gRNA cleavage sites, based on SNP patterns  
240 upstream and downstream of the gRNA target (Figure 3B, E). KO-5 harbors a fusion junction between  
241 *MYB186m1* and *MYB138m1* with a ~29 Kb genomic dropout, whereas KO-69 contains a fusion of  
242 *MYB138m1* and *MYB138m2* with a ~62 Kb genomic dropout (Figure 3E, Figure S2). Together, our  
243 findings show that a single gRNA is highly effective for multiplex KO of tandem duplicates via either  
244 small indels or large deletions.

245

#### 246 **Growth, leaf transpiration and insect response of glabrous mutants**

247 The trichome mutation did not impact growth rate as plant height and stem diameter were comparable  
248 to the controls over a seven-week period under glasshouse conditions (Figure 4A-B). Stem and leaf dry  
249 biomass also did not differ significantly between controls and mutants (Figure 4C-D). As trichomes can  
250 influence transpiration by acting as a barrier between the leaf and its environment (reviewed in  
251 Karabourniotis et al., 2020), we monitored transpiration-driven water uptake via petiole feeding and  
252 also leaf water loss during benchtop drying. Transpiration rates were measured using mature leaves  
253 (LPI-10 to LPI-15) of growth chamber plants either matched by size (whole leaf), or trimmed with a  
254 stencil 24 hours in advance to control for leaf area. No differences were seen in water uptake over six  
255 hours for whole leaves ( $p=0.48$ ) or trimmed leaves ( $p=0.38$ ) (Figure 4E). We also detected no differences



256 in rate of water loss between glasshouse-grown mutants and controls for LPI-6 ( $p=0.68$ ) or LPI-20  
257 ( $p=0.16$ ) over a three-hour drying period, though higher variation was observed in younger leaves  
258 overall (Figure 4F). The trichomeless mutants were more susceptible to thrip damage than controls,  
259 consistent with a role of trichomes in defense against insect pests (Figure S3).

260

### 261 **Altered expression of genes involved in development and hormonal responses in trichomeless leaves**

262 We next investigated transcriptomic changes in trichomeless leaves, focusing on expanded leaves (LPI-6)  
263 post trichome initiation. We confirmed, as anticipated based on their developmental profiles (Fig. 1),  
264 that *MYB186*, *MYB138* and *MYB38* were no longer expressed in LPI-6 of WT and  $\Delta G$  controls (Table S1).  
265 The ancient duplicate *MYB83* was well expressed in LPI-6 and unaffected in the glabrous mutants (Table  
266 S1), excluding its involvement in trichome development.

267

268 Differential expression (DE) analysis identified 319 significantly up-regulated and 469 down-regulated  
269 genes ( $p \leq 0.01$ , fold change  $\geq 1.5$ , RPKM  $\geq 3$ ) in trichomeless LPI-6 when compared with controls  
270 (Dataset S2). Among those up-regulated were genes encoding orthologs of other trichome regulators,  
271 such as kinesin-interacting calcium-binding protein (KIC) and zinc finger protein GLABROUS  
272 INFLORESCENCE STEMS (GIS) (Figure 5A). GIS acts upstream of the MBW complex (Gan et al., 2006),  
273 whereas KIC regulates post-initiation microtubule-associated trichome morphogenesis (Oppenheimer et  
274 al., 1997; Reddy et al., 2004). In addition, genes encoding putative negative regulators of trichome  
275 branching were significantly down-regulated in the trichomeless mutants (Figure 5A), including  
276 ubiquitin-protein ligase3 (UPL3; Downes et al., 2003), calpain-type cysteine protease (DEFECTIVE  
277 KERNEL1 or DK1; Galletti et al., 2015) and guanine nucleotide exchange factor (SPIKE1; Qiu et al., 2002).  
278 Misregulation of these genes may reflect multiple compensatory responses to compromised trichome  
279 development in the mutants.

280

281 DE genes that were up-regulated in the glabrous leaves showed a significant enrichment of Gene  
282 Ontology (GO) terms associated with various hormonal responses (Figure 5B). Specifically, genes  
283 involved in GA biosynthesis and perception (Mauriat and Moritz, 2009), as well as JA biosynthesis,  
284 turnover and signaling (Widemann et al., 2013) were significantly up-regulated (Figure 5A). These  
285 findings are consistent with synergistic involvement of GA and JA in promoting trichome formation (Qi  
286 et al., 2011), and with compensatory responses of glabrous mutants to trichome inhibition. In contrast,  
287 we observed an overrepresentation of “shoot system morphogenesis” among DE genes down-regulated

288 in the mutants (Figure 5B). For example, genes encoding orthologs of *Arabidopsis* TOPLESS-RELATED3  
289 (TPR3), a corepressor implicated in several developmental programs (Long et al., 2006; Tao et al., 2013),  
290 and its potential interacting partner (SUPPRESSOR OF MORE AXILLARY GROWTH2-LIKE or SMXL)  
291 (Soundappan et al., 2015) were significantly down-regulated in the mutants (Figure 5A). Also down-  
292 regulated were orthologs of known developmental regulators involved in seedling morphogenesis  
293 (*RADIALIS-LIKE SANT/MYB3*, *RSM3*) (Hamaguchi et al., 2008) and leaf development, such as  
294 *ROTUNDIFOLIA-LIKE14 (RTFL14)* (Narita et al., 2004; Wen et al., 2004) and *TCP2-1 (TEOSINTE*  
295 *BRANCHED1/CYCLOIDEA/PROLIFERATING CELL FACTOR)* (Cheng et al., 2021) (Figure 5A). These data add  
296 to a growing body of evidence that trichome development shares transcriptional and hormonal  
297 regulation with other developmental processes (Matías-Hernández et al., 2016).

298

### 299 **Circadian and light-regulated gene expression in trichomeless mutants**

300 We observed an overrepresentation of GO terms associated with chloroplast organization,  
301 photosynthesis, circadian rhythm, phototropism, and various light responses within the down-regulated  
302 DE genes, and responses to osmotic stress and wounding, water transport and metal ion transport  
303 within the up-regulated DE genes (Figure 5B). Many of the overrepresented GO terms are consistent  
304 with the roles of trichomes as a barrier to wounding, transpiration and light absorbance. We detected  
305 significantly decreased transcript levels of orthologs involved in circadian clock regulation, including  
306 *GIGANTEA (GI)* (Park et al., 1999), *JUMONJI DOMAIN (JMJD5)* (Jones et al., 2010), *TIME FOR COFFEE (TIC)*,  
307 Hall et al., 2003) and *PSUEDO-RESPONSE REGULATOR5 (PRR5)* (Matsushika et al., 2000) (Figure 5C).  
308 Diurnal expression of these genes has been previously reported in poplar leaves (Filichkin et al., 2011).  
309 Many of these proteins are known to integrate light signaling and circadian rhythm to affect  
310 photomorphogenesis (Ni, 2005). Indeed, genes encoding blue light receptors phototropins (PHOT1 and  
311 PHOT2, Briggs et al., 2001) were down-regulated in the mutants (Figure 5C), as were components of  
312 blue light-dependent circadian cycles, namely GI and flavin-binding kelch repeat F box protein (FKF,  
313 Imaizumi et al., 2003) (Figure 5C). Widespread downregulation was also observed for orthologs involved  
314 in photosystem I (PSI) and PSII, chlorophyll biosynthesis and chloroplast import apparatus (Dataset S2),  
315 suggesting numerous chloroplast processes were impacted in the absence of trichomes.

316

317 Consistent with altered light responses, we frequently observed red coloration of young glabrous leaves  
318 when plants neared supplemental lights. To further explore this, plants were grown under high-light  
319 conditions, and as expected, mutant leaves developed an intense red color (Figure 6) indicative of

320 anthocyanins, a photoprotective flavonoid (Smillie and Hetherington, 1999). The glabrous mutants  
321 produced significantly higher levels of anthocyanins in LPI-3 and marginally so in LPI-5, but not in LPI-15  
322 farther down and likely shielded by upper leaves (Figure 6C). The results suggest elevated anthocyanin  
323 biosynthesis as a photoprotective mechanism in the glabrous mutants.

324

#### 325 **Absence of triterpenes in trichomeless leaves**

326 Trichomes as epidermal outgrowths are covered with waxy cuticles like other epidermis cells (Hegebarth  
327 et al., 2016). We thus investigated whether leaf surface wax load and composition differed between  
328 control and trichomeless plants. Total wax load of mature leaves did not change significantly between  
329 genotypes (Figure 7A). Alkanes were the most abundant class of leaf cuticular waxes detected in 717  
330 and differed little between control and trichomeless plants (Figure 7B). In contrast, levels of triterpenes,  
331 fatty alcohols and  $\beta$ -sitosterol were significantly reduced in the mutants (Figure 7B-D). Specifically, the  
332 wax of mutant leaves was devoid of any triterpenes, including  $\alpha$ -amyirin,  $\beta$ -amyirin,  $\beta$ -amyrone and  
333 lupenone (Figure 7E). Two primary alcohols, 1-octacosanol (C28) and 1-hexacosanol (C26), were  
334 depleted in the mutants by >50% (Figure 7C), and  $\beta$ -sitosterol, by 42% (Figure 7D). To further investigate  
335 the absence of triterpenes in the mutant wax, whole leaf tissues were also profiled for compounds that  
336 were significantly reduced in cuticular wax. Again, triterpenes were not detected in the leaves of  
337 trichomeless mutants (Figure 7E), whereas 1-octacosanol, 1-hexacosanol and  $\beta$ -sitosterol were detected  
338 at levels comparable with controls (Figure 7C, D). The lack of triterpenes in the trichomeless leaves thus  
339 suggests triterpene biosynthesis occurs within the non-glandular trichomes of 717.

340

341 We then examined the whole-leaf RNA-seq data for molecular evidence in support of altered wax  
342 composition in the mutants (Figure 7F). Orthologs of known triterpene biosynthetic genes (Thimmappa  
343 et al., 2014) were found to be poorly expressed in the leaves we sampled for both controls and mutants.  
344 This may reflect a dilution effect of trichome-specific transcripts in the whole-leaf transcriptome or  
345 suggest triterpene biosynthesis has already ceased in LPI-6. The trichomeless leaves exhibited significant  
346 down-regulation of *PtaSTE1.1* (Potri.004G097500), encoding a  $\Delta^7$ -sterol- $C_5$ -desaturase orthologous to  
347 *Arabidopsis* AtSTE1 involved in sterol biosynthesis (Gachotte et al., 1995), and of *PtaFAR3.1*  
348 (Potri.004G185000), encoding a fatty acyl-CoA reductase orthologous to *Arabidopsis* AtFAR3 (also called  
349 ECERIFERUM4 or CER4) involved in the synthesis of primary alcohols for cuticular wax formation  
350 (Rowland et al., 2006). However, transcript levels of their respective genome duplicates, *PtaSTE1.2*  
351 (Potri.017G116600) and *PtaFAR3.2* (Potri.009G145000), remained unchanged (Figure 7F). Such

352 discrepancies were also observed among genome duplicates of several other fatty acid biosynthetic  
353 genes (Figure 7F). In *Arabidopsis* rosette leaves, wax biosynthesis and composition have been shown to  
354 differ between trichomes and pavement cells (Hegebarth et al., 2016); for example, *AtFAR3* expression  
355 is restricted to trichomes (Rowland et al., 2006). The specific down-regulation of *PtaSTE1.1* and  
356 *PtaFAR3.1* in glabrous leaves may therefore hint at their preferential involvement in trichome wax  
357 biosynthesis.

358

359

## 360 **DISCUSSION**

361 The role of trichomes in pest deterrence, transpiration and light absorbance and reflectance is well  
362 documented (Bickford, 2016; Karabourniotis et al., 2020). Previously, elevated expression of *PtaMYB186*  
363 in 717 was shown to increase trichome density, resulting in increased growth, leaf transpiration,  
364 stomata conductance, gas exchange and resistance to feeding insects (Plett et al., 2010). In the present  
365 study, CRISPR/Cas9-KO of *PtaMYB186* and its paralogs *PtaMYB138* and *PtaMYB38* resulted in the  
366 complete absence of trichomes on stem, leaf and petiole surfaces. An increased pest susceptibility in the  
367 glabrous poplar was observed. However, no significant differences in growth or transpiration were  
368 detected under the experimental conditions. Further research under field conditions may be required to  
369 fully explore the relationship between water use, growth and trichome coverage in poplar.

370

371 Transcriptome profiling results support an intricate role of trichomes in photoresponses, as glabrous  
372 leaves showed widespread down-regulation of genes involved in circadian rhythms, photoreception, and  
373 photomorphogenesis. The trichomeless mutants also exhibited increased sensitivity to light, and  
374 hyperaccumulated anthocyanins in the upper leaves under high light regimes. The results are in  
375 agreement with trichomes and anthocyanins both acting as light screens (Liakopoulos et al., 2006), and  
376 point to increased anthocyanin accrual as a compensatory photoprotective response in the glabrous  
377 mutants. As anthocyanin biosynthesis is also regulated by the MBW complex (Ramsay and Glover, 2005),  
378 accumulation of anthocyanins in the KO mutants rules out the involvement of MYB186, MYB138 and  
379 MYB38 in poplar anthocyanin biosynthesis.

380

381 The glabrous mutants provide strong support for an essential role of *PtaMYB186/138/38* in trichome  
382 development of 717. Loss of trichomes did not significantly affect the total epidermal wax load, but led  
383 to a complete absence of triterpenes both in cuticular wax and whole leaves of the mutants. The results

384 do not support a role for these MYBs in cuticle development in poplar as has been reported for their  
385 Arabidopsis orthologs AtMYB106 and AtMYB16 (Oshima et al., 2013), and hint at functional divergence  
386 of clade 15 MYBs between these two species. Although we cannot rule out a direct involvement of  
387 MYB186/138/38 in triterpene biosynthesis (*i.e.*, lack of triterpenes as a direct KO effect), MYBs that have  
388 been implicated in triterpene regulation belong to phylogenetically distinct clades (Wilkins et al., 2009;  
389 Falginella et al., 2021). The absence of triterpenes in trichomeless leaves led us to suggest trichomes as  
390 sites of triterpene biosynthesis and storage in poplar. While glandular trichomes are well known for  
391 their roles in biosynthesis and storage of terpenes (Lange and Turner, 2013; Lange and Srividya, 2019),  
392 there is only limited reporting of terpenes in non-glandular trichomes in *Artemisia annua* (Wang et al.,  
393 2009; Soetaert et al., 2013) and Lamiaceae and Verbenaceae species (dos Santos Tozin et al., 2016).  
394 Detection of triterpenes in poplar with non-glandular trichomes thus adds to the growing body of  
395 evidence for this conserved function.

396  
397 This study demonstrates that a single gRNA targeting conserved genomic sites is highly effective for  
398 multiplex editing, despite the unexpected genomic complexity in hybrid 717. The population of 30  
399 independent KO lines experienced an average of 5.4 cleavages per line based on indel alleles, which is  
400 likely an underestimate because many NA alleles also resulted from cleavages as shown for KO-5 and  
401 KO-69 (Figure 3). The work highlights the importance of ensuring SNP-free targets for gRNA design when  
402 working within a highly heterozygous genome (Zhou et al., 2015). Additionally, the negligible editing by  
403 the  $\Delta G$  construct provides insight into scaffold structure and stability. The  $\Delta G$  configuration can lead to  
404 two hypothetical outcomes: either the guanine is omitted from the scaffold and the gRNA remains intact  
405 and capable of base pairing to the target sites for Cas9 cleavage, or the guanine is sequestered for  
406 secondary structure folding of the scaffold, resulting in a 3'-truncated gRNA no longer PAM-adjacent at  
407 the target sites (Figure 2B). The lack of mutations in  $\Delta G$  transformants supports the latter scenario and is  
408 consistent with transcription and folding of gRNA molecules preceding their base-pairing with genomic  
409 targets. Moreover, the low trichome density of KO-27 suggests that MYB38 plays a redundant but minor  
410 role in leaf/stem trichome initiation. Follow-up research, including use of CRISPR to address the allele  
411 dose-response, is needed to dissect the functional redundancy of clade 15 MYB members more fully.  
412 Finally, the unedited (WT) *MYB38* alleles in KO-27 appear stable during vegetative propagation as this  
413 event has maintained a low trichome density for over two years in both tissue culture and greenhouse  
414 environments. This contributes to previously reported stability of CRISPR editing outcomes in clonally  
415 propagated poplar (Bewg et al., 2018).

416

417

## 418 **MATERIALS AND METHODS**

419

### 420 **Generation of KO mutants**

421 The  $\Delta G$  and KO constructs in p201N-Cas9 (Jacobs et al., 2015) were prepared by Gibson assembly. PCR  
422 was used to amplify the p201N-Cas9 binary vector following *Swa*I (New England BioLabs) digestion, and  
423 the *Medicago truncatula* MtU6.6 promoter and scaffold fragments from HindIII and EcoRI (New England  
424 BioLabs) digested pUC-gRNA shuttle vector (Jacobs et al., 2015), with Q5 High-Fidelity DNA Polymerase  
425 (New England BioLabs) and primers (Sigma) listed in Table S2. The p201N-Cas9 (Addgene 59175) and  
426 pUC-gRNA (Addgene 47024) plasmids were both gifts from Wayne Parrott. Two pairs of oligos (Sigma)  
427 corresponding to the consensus gRNA target site in exon two of *MYB186* (Potri.008G089200), *MYB138*  
428 (Potri.008G089700) and *MYB38* (Potri.010G165700) were assembled with p201N-Cas9. The NEBuilder  
429 HiFi DNA Assembly Cloning Kit (New England Biolabs) was used to assemble p201N-Cas9, MtU6.6  
430 promoter and scaffold fragments with a pair of oligos containing the gRNA target sequence (Table S2).  
431 Following transformation into DH5 $\alpha$  *E. coli* (Zymo Research Mix & Go! Competent Cells), PCR-positive  
432 colonies were used for plasmid purification before Sanger sequencing (Eurofins) confirmation. Plasmids  
433 were then heat-shocked into *Agrobacterium tumefaciens* strain C58/GV3101 (pMP90) (Koncz and Schell,  
434 1986) and confirmed by colony PCR.

435

436 *Populus tremula x alba* (IRNA 717-1B4) transformation and regeneration was performed as outlined in  
437 Meilan and Ma (2006), except 0.05 mg/L 6-benzylaminopurine was used in shoot elongation media, and  
438 200 mg/L L-glutamine was added to all media, with 3 g/L gellan gum (PhytoTechnology Lab) as a gelling  
439 agent. Following a 2-day agrobacterial cocultivation, leaf discs were washed in sterile water followed by  
440 washing in 200 mg/L cefotaxime and 300 mg/L timentin with shaking for 1.5 hr. Transformants were  
441 selected on media supplemented with 100 mg/L kanamycin, 200 mg/L cefotaxime and 300 mg/L  
442 timentin for callus induction and shoot regeneration and with kanamycin and timentin for shoot  
443 elongation and rooting. All cultures were grown and maintained at 22°C under a 16-hr light/8-hr dark  
444 photoperiod with Growlite® FPV24 LED (Barron Lighting Group) at  $\sim 150 \mu\text{mol}/\text{m}^2/\text{s}$ .

445

### 446 **Amplicon sequencing determination of mutation spectrums**

447 Newly emerged leaves were excised from individual events in tissue culture for genomic DNA extraction  
448 (Dellaporta et al., 1983). The DNA pellet was resuspended in water with RNase A (10 µg/mL) for  
449 amplicon library preparation using GoTaq G2 Green Master Mix (Promega) and primers (Table S2)  
450 spanning the gRNA target site (between 264 bp to 280 bp). Samples were then barcoded with Illumina  
451 amplicon indexing primers and pooled for Illumina MiSeq nano PE150 sequencing performed at the  
452 University of Georgia's Georgia Genomics and Bioinformatics Core. Demultiplexed sequence reads were  
453 analyzed by the AGEseq (Analysis of Genome Editing by Sequencing) program (Xue and Tsai, 2015), with  
454 mismatch allowance set at 1%, followed by manual curation.

455  
456 Because initial amplicon data analysis revealed lower editing efficiencies (<90%) than we typically  
457 observed in 717 (Zhou et al., 2015; Bewg et al., 2018) at several target sites, we performed *de novo*  
458 assembly of WT amplicon reads using Geneious, and recovered seven distinct alleles. We then searched  
459 the JGI draft 717 genome assembly v1.0 with the *P. trichocarpa* Nisqually-1 v3.0 (Phytozome v12)  
460 *MYB186*, *MYB138* and *MYB38* gene models and extracted the surrounding 50-150 Kb regions from Chr8  
461 and Chr10 for manual annotation against the *P. trichocarpa* Nisqually-1 reference (Figure 3A). The  
462 matching *MYB* gene sequences were extracted for error correction using 717 resequencing data (Xue et  
463 al., 2015). Curated sequences were used for new (amplicon and allele-/gene-specific) primer design and  
464 as references in amplicon data analysis. In the case of WT and transgenic controls with no editing,  
465 erroneous read assignments—and hence indel calls—still remained because the amplicon region  
466 between some alleles differs only in the number of intronic dinucleotide (GT) repeats (Dataset S1).  
467 Misassigned reads led to erroneous indel calls of -2, +2 or their multiples outside of the gRNA target site.  
468 For this reason, WT and control samples were processed by *ustacks* from *Stacks* 2.3 (Catchen et al.,  
469 2011). Parameters were adjusted to avoid collapsing reads with SNPs and/or Indels from paralogous  
470 alleles into the same tag group and gapped alignments were disabled. Tags from the output were then  
471 used for allele assignment.

472

### 473 **Phenotypic and transpiration measurements**

474 Tissue culture plants were transferred into soil (Moisture Control Potting Mix, Scotts Miracle-Grow) in 4"  
475 pots and maintained in a walk-in growth room. A subset of plants, 8-10 weeks of age, were transferred  
476 to a glasshouse in the Whitehall Forest at the University of Georgia in early summer. Plants were  
477 repotted into 1-gal pots and acclimated for two weeks prior to commencing growth measurements. No  
478 supplemental lighting was used, and glasshouse temperature was maintained at ~5°C below daytime

479 ambient temperature by evaporative cooling. Biocontrol (Evergreen Growers Supply) was applied  
480 monthly. Plant height and stem diameter measurements were monitored over a 7-week period. Plants  
481 were then destructively harvested for stem (30 cm above soil level) and leaf biomass following drying at  
482 room temperature in open paper bags for five weeks. To determine rate of water loss during leaf drying,  
483 leaf plastochron index LPI-6 and LPI-20 (including petiole) from glasshouse plants were placed on wet  
484 paper towel in the dark for 1.5 hr to fully hydrate before being blotted dry with paper towel and allowed  
485 to dry abaxial side up at room temperature. Leaf weights were recorded every 20 min. Leaf water  
486 uptake via transpiration was performed using whole leaves of growth chamber plants between LPI-10  
487 and LPI-15 matched by size. Leaves were placed on wet paper towel for 1.5 hr in the dark to fully  
488 hydrate, and the end of the petiole was trimmed underwater to minimize embolism before placing the  
489 leaves, petiole first, into a 15 mL centrifuge tube filled with water. Leaves were then incubated under  
490 growth lights (250-300  $\mu\text{M}/\text{m}^2/\text{s}$ ) and weights were recorded hourly for six hours. An empty tube with  
491 water was weighed as evaporation control. A second experiment was performed using trimmed leaves  
492 from growth chamber plants using the same methods as above, except leaves were trimmed following a  
493 stencil the day before experiment to control for leaf area. All repeated measures ANOVA analyses were  
494 performed with JMP Pro Version 15.0.0 (SAS), with  $p$  values determined after application of the  
495 Greenhouse-Geisser epsilon correction. For pest susceptibility monitoring, newly transplanted and  
496 acclimated plants were grown in a walk-in growth chamber without regular biocontrol applications.  
497 Thrip damage to new growth was then photographed.

498

#### 499 **RNA-seq analysis**

500 LPI-6 from 10-week-old soil-grown growth chamber plants (three WT, three  $\Delta\text{G}$  and five KO lines) were  
501 harvested for RNA extraction using Direct-zol RNA MiniPrep kit (Zymo Research) with Plant RNA  
502 Purification Reagent (Invitrogen). For developmental profiling, LPI-1, LPI-5 and LPI-15 were collected  
503 from three greenhouse-grown WT plants (~5 ft in height) for RNA extraction as above. RNA-seq library  
504 preparation and Illumina NextSeq 500 sequencing was performed at the Georgia Genomics and  
505 Bioinformatics Core. We obtained 9.3-15.2 million (M) SE-75 reads per sample for the KO leaf  
506 transcriptome experiment, and 10.8-13.3 PE75 reads per sample for the leaf developmental series. After  
507 pre-processing to remove adapter and rRNA sequences, reads were mapped to the 717 SNP-substituted  
508 genome sPta717 v2 (Xue et al., 2015) using STAR v2.5.3a (Dobin and Gingeras, 2015). Transcript  
509 abundance was estimated by featureCounts v1.5.2 (Liao et al., 2014) for differential expression analysis  
510 by DESeq2 v1.22 (Love et al., 2014) with multiple testing corrections by SLIM (Wang et al., 2011).



511 Differentially expressed genes selected based on RPKM (reads per kb transcript per million mapped  
512 reads)  $\geq 3$ ,  $P \leq 0.01$  and fold-change (FC)  $\geq 1.5$  were subjected to Gene Ontology (GO) enrichment analysis  
513 using topGO v2.38 (Alexa and Rahnenfuhrer, 2010) with Fisher's exact test and the negative  $\log_{10}$ -  
514 transformed  $P$  values were used for heatmap visualization. Gene expression ratios between KO and  
515 control (WT and  $\Delta G$ ) samples are visualized as heatmaps using BAR HeatMapper Plus Tool  
516 ([http://bar.utoronto.ca/ntools/cgi-bin/ntools\\_heatmapper\\_plus.cgi](http://bar.utoronto.ca/ntools/cgi-bin/ntools_heatmapper_plus.cgi)). Whole-genome duplication  
517 inference was determined based on  $K_s$  (synonymous substitution rate) distribution and collinearity  
518 analysis using the *P. trichocarpa* Nisqually-1 v3.0 reference genome (Phytozome v12) (Tuskan et al.,  
519 2006) and the wgd tool suite (Zwaenepoel and Van de Peer, 2018).

520

#### 521 **Determination of leaf and cuticle wax compositions**

522 One-inch leaf punches were taken from mature leaves of similar size (between LPI-10 and LPI-15) of soil-  
523 grown plants in a growth chamber and washed in 4 mL of methylene chloride for 30 sec. The washes  
524 were dried under a continuous  $N_2$  stream before resuspension in 400  $\mu$ L chloroform. A 200 $\mu$ L aliquot  
525 was subsequently dried under vacuum and the residues shipped to the Oak Ridge National Laboratory  
526 for analysis. Sorbitol (1 mg/mL) was added to the residues as an internal standard and re-dried under  $N_2$ .  
527 For whole leaf analysis, liquid nitrogen-ground and freeze-dried powders from LPI-5 (25 mg) of control  
528 and KO plants were extracted by 80% ethanol to which sorbitol (1 mg/mL) was added and dried under  
529  $N_2$ . The samples were derivatized prior to analysis on an Agilent Technologies 7890A GC coupled to a  
530 5975C inert XL MS fitted with an Rtx-5MS capillary column with a 5m Integra-Guard column (Restek) as  
531 described in Holwerda et al. (2014). Compound identification was based on mass spectral fragmentation  
532 patterns against the NIST08 database and an in-house library built with authentic standards.

533

#### 534 **Determination of relative anthocyanin content after light-stress**

535 Plants were grown under 16-hr high-light provided by a King Plus 1500W LED full spectrum grow light  
536 (KingLED) for four weeks in a growth chamber before leaves (petiole and midvein removed) were  
537 harvested and snap frozen in liquid nitrogen. At the time of harvest, plants were experiencing a light  
538 intensity gradient of 2300 to 800  $\mu$ M/m<sup>2</sup>/s at LPI-1, depending on the plant height, and of 1-18  $\mu$ M/m<sup>2</sup>/s  
539 at LPI-20. Relative anthocyanin content was determined in LPI-3, 5 and 15 following the methods of Neff  
540 and Chory (1998) with the following modifications. Briefly, 40 mg of liquid nitrogen-ground and freeze-  
541 dried powder were extracted in 800  $\mu$ L methanol acidified with 1% HCl overnight at 4°C in dark.  
542 Supernatant was extracted with 200  $\mu$ L dH<sub>2</sub>O/500  $\mu$ L chloroform three times before 400  $\mu$ L was mixed

543 with 400  $\mu$ L of 60% acidified methanol for spectrophotometry at  $A_{530}$  and  $A_{657}$ . Relative abundance of  
544 anthocyanin was expressed as  $A_{530}$  corrected for scattering at  $A_{657}$ . Two-tailed Student's *t*-test was  
545 determined using JMP Pro Version 15.0.0 (SAS).

546

#### 547 **Tissue Imaging and SEM analysis**

548 Images of poplar were taken with either a Google Pixel 3a running Android v11, or a Leica M165 FC  
549 dissection microscope attached to a Leica DFC500 camera running Leica Application Suite software  
550 v3.8.0. Scanning electron microscopic (SEM) observations were obtained using Hitachi 3400 NII (Hitachi  
551 High Technologies America) microscope following optimized protocols at the Center for Ultrastructural  
552 Research at the Fort Valley State University. LPI-1 from growth chamber plants or young leaves of tissue  
553 culture plants were processed for primary fixation at 25°C in 2 % glutaraldehyde (Electron Microscopy  
554 Sciences, EMS) prepared with Sorensen's Phosphate buffer, pH 7.2 (EMS) for one hour and then washed  
555 three times for 15 min each with the same buffer before secondary fixation in 1% osmium tetroxide  
556 (EMS) prepared in Sorensen's Phosphate buffer, pH 7.2 for 1 hour at 25°C. After three washes with dH<sub>2</sub>O  
557 for 15 min each, fixed tissues were dehydrated with ethanol series passing through 25%, 50%, 75%, and  
558 95% for 15 min each, followed by three changes of 100% ethanol for 15 min each. Critical point drying of  
559 fixed samples was conducted using a critical point dryer (Leica) and then samples were placed on Hitachi  
560 M4 aluminum specimen mounts (Ted Pella) using double sided carbon adhesive tabs (EMS) for coating.  
561 Gold coating of 50 Å thickness was done for 60 sec using sputter coater (Denton Desk V) under a vacuum  
562 pressure of 0.05 torr. Image acquisition in various magnification was done at accelerating voltage of 5  
563 KV.

564

#### 565 **ACCESSION NUMBERS**

566 The RNA-seq data has been deposited to the National Center for Biotechnology Information's Sequence  
567 Read Archive under accession Nos. PRJNA752367 and PRJNA753499.

568

#### 569 **ACKNOWLEDGEMENTS**

570 The authors thank Gilles Pilate of the Institut National de la Recherche Agronomique, France for  
571 providing poplar clone INRA 717-1B4, Margot Chen for tissue culture assistance, Kavita Aulakh for RNA  
572 extraction, Yingying Zhu for RNA from developmentally staged leaves and Liang-Jiao Xue for guidance on  
573 RNA-seq data processing. We additionally thank the Department of Energy Joint Genome Institute and

574 collaborators for prepublication access to the *Populus tremula* x *P. alba* (IRNA 717-1B4) genome  
575 sequence and annotation.

576

577

## 578 SUPPORTING INFORMATION

579 **Table S1.** Transcript levels of trichome-regulating MBW genes based on RNA-seq.

580 **Table S2.** Primers used in this study.

581 **Figure S1.** PCR confirmation of NA alleles using allele-specific primers.

582 **Figure S2.** Sequence alignment of wild type and fusion *MYB* alleles from KO-5 and KO-69.

583 **Figure S3.** Susceptibility of trichomeless mutants to thrip damage.

584 **Dataset S1.** CRISPR/Cas9 mutation patterns of the eight target *MYB* alleles in  $\Delta G$  and KO lines.

585 **Dataset S2.** Differentially expressed genes detected in trichomeless leaves.

586

587

## 588 FIGURE LEGENDS

589

590 **Figure 1.** Expression of clade 15 *MYB* transcription factors during *Populus* leaf maturation.

591 A simplified phylogenetic tree is shown with duplication history noted on the left. Data are mean $\pm$ SD of

592 n=3. LPI, leaf plastochron index; FPKM, fragments per kilobase of transcript per million mapped reads;

593 MYB186, Potri.008G089200; MYB138, Potri.008G089700; MYB38, Potri.010G165700; and MYB83,

594 Potri.017G086300.

595

596 **Figure 2.** CRISPR/Cas9 KO of trichome-regulating *MYBs*.

597 **A,** Schematic illustrations of the *MYB* gene structure, gRNA target site, and base pairing between the

598 genomic target (black) and the gRNA spacer (red)-scaffold (blue) molecule. Black line denotes the

599 protospacer adjacent motif (PAM). **B,** Zoomed-in view of the  $\Delta G$  vector configuration at the gRNA

600 spacer-scaffold junction with a guanine omission. **C-R,** Representative shoot tip (C, G, K, O) and LPI-1

601 abaxial (D, H, L, P) phenotypes and SEM images (E, F, I, J, M, N, Q, R) of soil-grown WT (D, E), Cas9 vector

602 control (C),  $\Delta G$  control (G-I), KO-27 (K-M), and null mutant (O-Q) plants, and leaf abaxial (F, N) or adaxial

603 (J, R) images of tissue cultured  $\Delta G$  (F, J) and null mutant (N, R) plants. Scale bar = 3 mm (D, H, L, P), 500

604  $\mu$ m (E, I, M), 1 mm (Q), or 25  $\mu$ m (F, J, N, R).

605

606 **Figure 3.** Mutation analysis of trichomeless mutants.

607 **A**, Schematic illustration of *MYB186* and *MYB138* on Chr8 subgenomes (main and alternative, or Chr8m  
608 and Chr8a, respectively) and *MYB38* on Chr10m and Chr10a of the 717 genome. Neighboring genes are  
609 color coded for synteny and the putative duplication block containing *MYB186* and *MYB138* on Chr8 is  
610 marked by red brackets. Black triangles denote the eight gRNA target sites. **B**, Mutation spectrum  
611 determined by amplicon sequencing. The eight alleles are arranged by genomic position for each plant  
612 line and color-coded for the editing outcomes: green, unedited (intact); orange, indel; and grey, no  
613 amplification (NA). **C**, Pie chart summary of the overall (left) and indel (right) editing patterns. **D**, PCR  
614 amplification of the six *MYB* alleles on Chr8 from two WT, one  $\Delta G$  and four KO lines. The four KO lines  
615 were selected to represent one (KO-5 and KO-69) or two (KO-63 and KO-70) remaining Chr08 alleles.  
616 *UBC* (*ubiquitin-conjugating enzyme*) was included as loading control. M, molecular weight marker; ntc,  
617 no-template control. **E**, Sanger sequencing of PCR products from D. Sequence alignment of the six alleles  
618 flanking the gRNA target site (red) is shown on top and chromatograms of the same region are shown  
619 below. Grey shaded regions are introns and PAM is underlined and boxed in blue for correspondence  
620 with the sequence traces below. Black triangles denote the Cas9 cleavage site and black dashed box  
621 corresponds to the 2-bp deletion (-2) detected in KO-5 and KO-69. The two fusion alleles as determined  
622 by SNPs are marked below the KO-5 and KO-69 traces (see Supplemental Figure S2 for the full sequence  
623 alignment).

624

625 **Figure 4.** Phenotypic characterization of trichomeless KO mutants.

626 **A-B**, Height (A) and diameter (B) growth monitored over seven weeks. **C-D**, Stem (C) and leaf (D)  
627 biomass at harvest. Only LPI31-LPI40 were used for leaf biomass. **E**, Transpiration-driven water uptake of  
628 size-matched whole leaves or leaves trimmed with stencil to control for surface area. **F**, Water loss  
629 during drying of leaves LPI-6 and LPI-20. Data are mean  $\pm$  SD of n=5-7 controls (WT and transgenic  
630 controls) or KO mutants grown in a greenhouse (A-D, F) or in a growth chamber (E). *P* values were  
631 determined using repeated measures ANOVA (A-B, E-F) or 2-tailed *t*-test (C-D).

632

633 **Figure 5.** Transcriptional responses of trichomeless leaves.

634 **A**, Expression response heatmaps of genes involved in trichome development, biosynthesis and signaling  
635 of GA and JA signaling and morphogenesis. **B**, Gene Ontology (GO) enrichment analysis of genes  
636 differentially up- or down-regulated in trichomeless leaves related to the control. Representative GO  
637 terms are visualized by the negative  $\log_{10}$ -transformed *P* values, with the color scales shown at the

638 bottom. Boldfaced values indicate  $P < 0.05$ ). C, Expression heatmaps of genes involved in regulation of  
639 circadian rhythm and light responses. Expression responses in A and C are shown in  $\log_2$ -transformed  
640 fold-change (FC, mutant/control) and visualized according to the color scales at the bottom. Average  
641 basal expression levels from control samples are shown in RPKM (reads per kilobase of transcript per  
642 million mapped reads) and visualized according to the color scales at the bottom.

643

644 **Figure 6.** Anthocyanin accumulation under high light conditions.

645 **A-B**, Representative examples of LPI-1 to LPI-5 from a Cas9 vector control plant (A) or a trichomeless  
646 mutant (B). **C**, Anthocyanin contents of LPI-3, LPI-5 and LPI-15. Data are mean  $\pm$  SE of  $n=6$  control or  $n=10$   
647 KO plants.  $P$  values were determined using 2-tailed  $t$ -test.

648

649 **Figure 7.** Cuticular wax composition of trichomeless and control leaves.

650 **A**, Total wax load. **B**, Major classes of cuticular wax. **C**, Fatty alcohols (C26, 1-hexacosanol; C28, 1-  
651 octacosanol) in wax (left) or whole leaves (right). **D**,  $\beta$ -sitosterol detected in wax (left) or whole leaves  
652 (right). **E**, Triterpenes detected in wax (top) or whole leaves (bottom). Ergosterone, 14,24-dimethyl-  
653 ergosta-8,25-dien-3-one; cycloartanone, 24-methylene cycloartan-3-one; lanosterone, lanosta-8,24-  
654 dien-3-one. Data are mean  $\pm$  SD of  $n=5$ . All concentration estimates were based on sorbitol equivalent.  
655 Statistical significance was determined by 2-tailed  $t$ -test (\*  $P < 0.05$ , \*\*  $P < 0.01$ , \*\*\*  $P < 0.001$ ). nd, not  
656 detected. **F**, Expression response heatmaps of genes involved in fatty acid and wax biosynthesis. Data  
657 presentation is the same as in Figure 5.

658

659

## 660 REFERENCES

- 661 **Alexa A, Rahnenfuhrer J** (2010) topGO: Enrichment Analysis for Gene Ontology. R package version 2.0.  
662 **Bewg WP, Ci D, Tsai CJ** (2018) Genome editing in trees: From multiple repair pathways to long-term  
663 stability. *Frontiers in Plant Science* **9**: 1732  
664 **Bickford CP** (2016) Ecophysiology of leaf trichomes. *Functional Plant Biology* **43**: 807-814  
665 **Briggs WR, Beck CF, Cashmore AR, Christie JM, Hughes J, Jarillo JA, Kagawa T, Kanegae H, Liscum E,**  
666 **Nagatani A, Okada K, Salomon M, Rüdiger W, Sakai T, Takano M, Wada M, Watson JC** (2001)  
667 The phototropin family of photoreceptors. *Plant Cell* **13**: 993-997  
668 **Catchen JM, Amores A, Hohenlohe P, Cresko W, Postlethwait JH** (2011) Stacks: Building and genotyping  
669 loci *de novo* from short-read sequences. *Genes Genomes Genetics* **1**: 171-182  
670 **Cheng Y, Wang L, Abbas M, Huang X, Wang Q, Wu A, Wei H, Peng S, Dai X, Li Q** (2021) MicroRNA319-  
671 mediated gene regulatory network impacts leaf development and morphogenesis in poplar.  
672 *Forestry Research* **1**: 4

- 673 **Dellaporta SL, Wood J, Hicks JB** (1983) A plant DNA miniprep: Version II. *Plant Molecular Biology*  
674 *Reporter* **1**: 19-21
- 675 **Dobin A, Gingeras TR** (2015) Mapping RNA-seq reads with STAR. *Curr Protoc Bioinformatics* **51**:  
676 11.14.11-11.14.19
- 677 **dos Santos Tozin LR, de Melo Silva SC, Rodrigues TM** (2016) Non-glandular trichomes in Lamiaceae and  
678 Verbenaceae species: Morphological and histochemical features indicate more than physical  
679 protection. *New Zealand Journal of Botany* **54**: 446-457
- 680 **Downes BP, Stupar RM, Gingerich DJ, Vierstra RD** (2003) The HECT ubiquitin-protein ligase (UPL) family  
681 in *Arabidopsis*: UPL3 has a specific role in trichome development. *Plant Journal* **35**: 729-742
- 682 **Falginella L, Andre CM, Legay S, Lin-Wang K, Dare AP, Deng C, Rebstock R, Plunkett BJ, Guo L, Cipriani**  
683 **G, Espley RV** (2021) Differential regulation of triterpene biosynthesis induced by an early failure  
684 in cuticle formation in apple. *Horticulture Research* **8**: 75
- 685 **Fambrini M, Pugliesi C** (2019) The dynamic genetic-hormonal regulatory network controlling the  
686 trichome development in leaves. *Plants* **8**: 253
- 687 **Filichkin SA, Breton G, Priest HD, Dharmawardhana P, Jaiswal P, Fox SE, Michael TP, Chory J, Kay SA,**  
688 **Mockler TC** (2011) Global profiling of rice and poplar transcriptomes highlights key conserved  
689 circadian-controlled pathways and cis-regulatory modules. *PLoS One* **6**: e16907
- 690 **Folkers U, Berger J, Hülkamp M** (1997) Cell morphogenesis of trichomes in *Arabidopsis*: Differential  
691 control of primary and secondary branching by branch initiation regulators and cell growth.  
692 *Development* **124**: 3779-3786
- 693 **Gachotte D, Meens R, Benveniste P** (1995) An *Arabidopsis* mutant deficient in sterol biosynthesis:  
694 Heterologous complementation by ERG 3 encoding a  $\Delta 7$ -sterol-C-5-desaturase from yeast. *Plant*  
695 *Journal* **8**: 407-416
- 696 **Galletti R, Johnson KL, Scofield S, San-Bento R, Watt AM, Murray JA, Ingram GC** (2015) DEFECTIVE  
697 KERNEL 1 promotes and maintains plant epidermal differentiation. *Development* **142**: 1978-  
698 1983
- 699 **Gan Y, Kumimoto R, Liu C, Ratcliffe O, Yu H, Broun P** (2006) GLABROUS INFLORESCENCE STEMS  
700 modulates the regulation by gibberellins of epidermal differentiation and shoot maturation in  
701 *Arabidopsis*. *Plant Cell* **18**: 1383-1395
- 702 **Gilding EK, Marks MD** (2010) Analysis of purified *glabra3-shapeshifter* trichomes reveals a role for  
703 *NOECK* in regulating early trichome morphogenic events. *Plant Journal* **64**: 304-317
- 704 **Glover BJ, Perez-Rodriguez M, Martin C** (1998) Development of several epidermal cell types can be  
705 specified by the same MYB-related plant transcription factor. *Development* **125**: 3497-3508
- 706 **Hall A, Bastow RM, Davis SJ, Hanano S, McWatters HG, Hibberd V, Doyle MR, Sung S, Halliday KJ,**  
707 **Amasino RM, Millar AJ** (2003) The TIME FOR COFFEE gene maintains the amplitude and timing  
708 of *Arabidopsis* circadian clocks. *Plant Cell* **15**: 2719-2729
- 709 **Hamaguchi A, Yamashino T, Koizumi N, Kiba T, Kojima M, Sakakibara H, Mizuno T** (2008) A small  
710 subfamily of *Arabidopsis* RADIALIS-LIKE SANT/MYB genes: A link to HOOKLESS1-mediated signal  
711 transduction during early morphogenesis. *Bioscience, Biotechnology, and Biochemistry* **72**:  
712 2687-2696
- 713 **Hegebarth D, Buschhaus C, Wu M, Bird D, Jetter R** (2016) The composition of surface wax on trichomes  
714 of *Arabidopsis thaliana* differs from wax on other epidermal cells. *Plant Journal* **88**: 762-774
- 715 **Holwerda EK, Thorne PG, Olson DG, Amador-Noguez D, Engle NL, Tschaplinski TJ, van Dijken JP, Lynd**  
716 **LR** (2014) The exometabolome of *Clostridium thermocellum* reveals overflow metabolism at high  
717 cellulose loading. *Biotechnology for Biofuels* **7**: 155
- 718 **Hülkamp M** (2004) Plant trichomes: A model for cell differentiation. *Nature Reviews: Molecular Cell*  
719 *Biology* **5**: 471-480

- 720 **Imaizumi T, Tran HG, Swartz TE, Briggs WR, Kay SA** (2003) FKF1 is essential for photoperiodic-specific  
721 light signalling in *Arabidopsis*. *Nature* **426**: 302-306
- 722 **Jacobs TB, LaFayette PR, Schmitz RJ, Parrott WA** (2015) Targeted genome modifications in soybean with  
723 CRISPR/Cas9. *BMC Biotechnology* **15**: 16
- 724 **Jakoby MJ, Falkenhan D, Mader MT, Brininstool G, Wischnitzki E, Platz N, Hudson A, Hulskamp M,**  
725 **Larkin J, Schnittger A** (2008) Transcriptional profiling of mature *Arabidopsis* trichomes reveals  
726 that *NOECK* encodes the MIXTA-like transcriptional regulator MYB106. *Plant Physiology* **148**:  
727 1583-1602
- 728 **Jones MA, Covington MF, DiTacchio L, Vollmers C, Panda S, Harmer SL** (2010) Jumonji domain protein  
729 JMJD5 functions in both the plant and human circadian systems. *Proc Natl Acad Sci U S A* **107**:  
730 21623-21628
- 731 **Karabourniotis G, Liakopoulos G, Nikolopoulos D, Bresta P** (2020) Protective and defensive roles of  
732 non-glandular trichomes against multiple stresses: Structure–function coordination. *Journal of*  
733 *Forestry Research* **31**: 1-12
- 734 **Koncz C, Schell J** (1986) The promoter of TL-DNA gene 5 controls the tissue-specific expression of  
735 chimaeric genes carried by a novel type of *Agrobacterium* binary vector. *Molecular & General*  
736 *Genetics* **204**: 383-396
- 737 **Lange BM, Srividya N** (2019) Enzymology of monoterpene functionalization in glandular trichomes.  
738 *Journal of Experimental Botany* **70**: 1095-1108
- 739 **Lange BM, Turner GW** (2013) Terpenoid biosynthesis in trichomes - Current status and future  
740 opportunities. *Plant Biotechnology Journal* **11**: 2-22
- 741 **Larkin JC, Brown ML, Schiefelbein J** (2003) How do cells know what they want to be when they grow  
742 up? Lessons from epidermal patterning in *Arabidopsis*. *Annual Review of Plant Biology* **54**: 403-  
743 430
- 744 **Liakopoulos G, Nikolopoulos D, Klouvatou A, Vekkos KA, Manetas Y, Karabourniotis G** (2006) The  
745 photoprotective role of epidermal anthocyanins and surface pubescence in young leaves of  
746 grapevine (*Vitis vinifera*). *Annals of Botany* **98**: 257-265
- 747 **Liao Y, Smyth GK, Shi W** (2014) featureCounts: an efficient general purpose program for assigning  
748 sequence reads to genomic features. *Bioinformatics* **30**: 923-930
- 749 **Long JA, Ohno C, Smith ZR, Meyerowitz EM** (2006) TOPLESS regulates apical embryonic fate in  
750 *Arabidopsis*. *Science* **312**: 1520-1523
- 751 **Love M, Huber W, Anders S** (2014) Moderated estimation of fold change and dispersion for RNA-seq  
752 data with DESeq2. *Genome Biology* **15**: 550
- 753 **Machado A, Wu Y, Yang Y, Llewellyn DJ, Dennis ES** (2009) The MYB transcription factor GhMYB25  
754 regulates early fibre and trichome development. *The Plant Journal* **59**: 52-62
- 755 **Maes L, Goossens A** (2010) Hormone-mediated promotion of trichome initiation in plants is conserved  
756 but utilizes species- and trichome-specific regulatory mechanisms. *Plant Signaling & Behavior* **5**:  
757 205-207
- 758 **Maes L, Inzé D, Goossens A** (2008) Functional specialization of the TRANSPARENT TESTA GLABRA1  
759 network allows differential hormonal control of laminal and marginal trichome initiation in  
760 *Arabidopsis* rosette leaves. *Plant Physiol* **148**: 1453-1464
- 761 **Matías-Hernández L, Aguilar-Jaramillo AE, Cigliano RA, Sanseverino W, Pelaz S** (2016) Flowering and  
762 trichome development share hormonal and transcription factor regulation. *Journal of*  
763 *Experimental Botany* **67**: 1209-1219
- 764 **Matsushika A, Makino S, Kojima M, Mizuno T** (2000) Circadian waves of expression of the APRR1/TOC1  
765 family of pseudo-response regulators in *Arabidopsis thaliana*: Insight into the plant circadian  
766 clock. *Plant Cell Physiology* **41**: 1002-1012

- 767 **Mauriat M, Moritz T** (2009) Analyses of GA20ox- and GID1-over-expressing aspen suggest that  
768 gibberellins play two distinct roles in wood formation. *Plant Journal* **58**: 989-1003
- 769 **Meilan R, Ma C** (2006) Poplar (*Populus* spp.). In K Wang, ed, *Agrobacterium Protocols Volume 2*.  
770 *Methods in Molecular Biology*, Vol 344. Humana Press, Totowa, NJ
- 771 **Narita NN, Moore S, Horiguchi G, Kubo M, Demura T, Fukuda H, Goodrich J, Tsukaya H** (2004)  
772 Overexpression of a novel small peptide ROTUNDIFOLIA4 decreases cell proliferation and alters  
773 leaf shape in *Arabidopsis thaliana*. *Plant Journal* **38**: 699-713
- 774 **Neff MM, Chory J** (1998) Genetic interactions between Phytochrome A, Phytochrome B, and  
775 Cryptochrome 1 during *Arabidopsis* development. *Plant Physiology* **118**: 27-36
- 776 **Ni M** (2005) Integration of light signaling with photoperiodic flowering and circadian rhythm. *Cell*  
777 *Research* **15**: 559-566
- 778 **Oppenheimer DG, Pollock MA, Vacik J, Szymanski DB, Ericson B, Feldmann K, Marks MD** (1997)  
779 Essential role of a kinesin-like protein in *Arabidopsis* trichome morphogenesis. *Proceedings of*  
780 *the National Academy of Sciences of the United States of America* **94**: 6261-6266
- 781 **Oshima Y, Shikata M, Koyama T, Ohtsubo N, Mitsuda N, Ohme-Takagi M** (2013) MIXTA-like  
782 transcription factors and WAX INDUCER1/SHINE1 coordinately regulate cuticle development in  
783 *Arabidopsis* and *Torenia fournieri*. *Plant Cell* **25**: 1609-1624
- 784 **Park DH, Somers DE, Kim YS, Choy YH, Lim HK, Soh MS, Kim HJ, Kay SA, Nam HG** (1999) Control of  
785 circadian rhythms and photoperiodic flowering by the *Arabidopsis* GIGANTEA gene. *Science* **285**:  
786 1579-1582
- 787 **Payne WW** (1978) A glossary of plant hair terminology. *Brittonia* **30**: 239-255
- 788 **Plett JM, Wilkins O, Campbell MM, Ralph SG, Regan S** (2010) Endogenous overexpression of *Populus*  
789 *MYB186* increases trichome density, improves insect pest resistance, and impacts plant growth.  
790 *Plant Journal* **64**: 419-432
- 791 **Qi T, Song S, Ren Q, Wu D, Huang H, Chen Y, Fan M, Peng W, Ren C, Xie D** (2011) The Jasmonate-ZIM-  
792 domain proteins interact with the WD-Repeat/bHLH/MYB complexes to regulate jasmonate-  
793 mediated anthocyanin accumulation and trichome initiation in *Arabidopsis thaliana*. *Plant Cell*  
794 **23**: 1795-1814
- 795 **Qiu JL, Jilk R, Marks MD, Szymanski DB** (2002) The *Arabidopsis* SPIKE1 gene is required for normal cell  
796 shape control and tissue development. *Plant Cell* **14**: 101-118
- 797 **Ramsay NA, Glover BJ** (2005) MYB-bHLH-WD40 protein complex and the evolution of cellular diversity.  
798 *Trends in Plant Science* **10**: 63-70
- 799 **Reddy VS, Day IS, Thomas T, Reddy AS** (2004) KIC, a novel Ca<sup>2+</sup> binding protein with one EF-hand motif,  
800 interacts with a microtubule motor protein and regulates trichome morphogenesis. *Plant Cell*  
801 **16**: 185-200
- 802 **Rowland O, Zheng H, Hepworth SR, Lam P, Jetter R, Kunst L** (2006) CER4 encodes an alcohol-forming  
803 fatty acyl-coenzyme A reductase involved in cuticular wax production in *Arabidopsis*. *Plant*  
804 *Physiology* **142**: 866-877
- 805 **Schuepp PH** (1993) Leaf boundary layers. *New Phytologist* **125**: 477-507
- 806 **Schuurink R, Tissier A** (2020) Glandular trichomes: Micro-organs with model status? *New Phytologist*  
807 **225**: 2251-2266
- 808 **Smillie RM, Hetherington SE** (1999) Photoabatement by anthocyanin shields photosynthetic systems  
809 from light stress. *Photosynthetica* **36**: 451-463
- 810 **Soetaert SSA, Van Neste CMF, Vandewoestyne ML, Head SR, A. G, Van Nieuwerburgh FCW, Deforce**  
811 **DLD** (2013) Differential transcriptome analysis of glandular and filamentous trichomes in  
812 *Artemisia annua*. *BMC Plant Biology* **13**: 220



- 813 **Soundappan I, Bennett T, Morffy N, Liang Y, Stanga JP, Abbas A, Leyser O, Nelson DC** (2015) SMAX1-  
814 LIKE/D53 family members enable distinct MAX2-dependent responses to strigolactones and  
815 karrikins in Arabidopsis. *Plant Cell* **27**: 3143-3159
- 816 **Tao Q, Guo D, Wei B, Zhang F, Pang C, Jiang H, Zhang J, Wei T, Gu H, Qu LJ, Qin G** (2013) The TIE1  
817 transcriptional repressor links TCP transcription factors with TOPLESS/TOPLESS-RELATED  
818 corepressors and modulates leaf development in Arabidopsis. *Plant Cell* **25**: 421-437
- 819 **Thimmappa R, Geisler K, Louveau T, O'Maille P, Osbourn A** (2014) Triterpene biosynthesis in plants.  
820 *Annual Review of Plant Biology* **65**: 225-257
- 821 **Tuskan GA, DiFazio S, Jansson S, Bohlmann J, Grigoriev I, Hellsten U, Putnam N, Ralph S, Rombauts S,  
822 Salamov A, Schein J, Sterck L, Aerts A, Bhalerao RR, Bhalerao RP, Blaudez D, Boerjan W, Brun  
823 A, Brunner A, Busov V, Campbell M, Carlson J, Chalot M, Chapman J, Chen GL, Cooper D,  
824 Coutinho PM, Couturier J, Covert S, Cronk Q, Cunningham R, Davis J, Degroeve S, Dejardin A,  
825 dePamphilis C, Detter J, Dirks B, Dubchak I, Duplessis S, Ehrling J, Ellis B, Gendler K, Goodstein  
826 D, Gribskov M, Grimwood J, Groover A, Gunter L, Hamberger B, Heinze B, Helariutta Y,  
827 Henrissat B, Holligan D, Holt R, Huang W, Islam-Faridi N, Jones S, Jones-Rhoades M, Jorgensen  
828 R, Joshi C, Kangasjarvi J, Karlsson J, Kelleher C, Kirkpatrick R, Kirst M, Kohler A, Kalluri U,  
829 Larimer F, Leebens-Mack J, Leple JC, Locascio P, Lou Y, Lucas S, Martin F, Montanini B, Napoli  
830 C, Nelson DR, Nelson C, Nieminen K, Nilsson O, Pereda V, Peter G, Philippe R, Pilate G,  
831 Poliakov A, Razumovskaya J, Richardson P, Rinaldi C, Ritland K, Rouze P, Ryabov D, Schmutz J,  
832 Schrader J, Segerman B, Shin H, Siddiqui A, Sterky F, Terry A, Tsai CJ, Uberbacher E, Unneberg  
833 P, Vahala J, Wall K, Wessler S, Yang G, Yin T, Douglas C, Marra M, Sandberg G, Van de Peer Y,  
834 Rokhsar D** (2006) The genome of black cottonwood, *Populus trichocarpa* (Torr. & Gray). *Science*  
835 **313**: 1596-1604
- 836 **Walker AR, Davison PA, Bolognesi-Winfield AC, James CM, Srinivasan N, Blundell TL, Esch JJ, Marks  
837 MD, Gray JC** (1999) The TRANSPARENT TESTA GLABRA1 locus, which regulates trichome  
838 differentiation and anthocyanin biosynthesis in *arabidopsis*, encodes a WD40 repeat protein.  
839 *Plant Cell* **11**: 1337-1349
- 840 **Wang B, Luo Q, Li Y, Yin L, Zhou N, Li X, Gan J, Dong A** (2020) Structural insights into target DNA  
841 recognition by R2R3-MYB transcription factors. *Nucleic Acids Research* **48**: 460-471
- 842 **Wang H-Q, Tuominen LK, Tsai C-J** (2011) SLIM: A sliding linear model for estimating the proportion of  
843 true null hypotheses in datasets with dependence structures. *Bioinformatics* **27**: 225-231
- 844 **Wang S, Chen J-G** (2014) Regulation of cell fate determination by single-repeat R3 MYB transcription  
845 factors in Arabidopsis. *Frontiers in Plant Science* **5**
- 846 **Wang S, Chen JG** (2014) Regulation of cell fate determination by single-repeat R3 MYB transcription  
847 factors in Arabidopsis. *Frontiers in Plant Science* **5**: 133
- 848 **Wang W, Wang Y, Zhang Q, Qi Y, Guo D** (2009) Global characterization of *Artemisia annua* glandular  
849 trichome transcriptome using 454 pyrosequencing. *BMC Genomics* **10**: 465
- 850 **Wen J, Lease KA, Walker JC** (2004) DVL, a novel class of small polypeptides: Overexpression alters  
851 *Arabidopsis* development. *Plant Journal* **37**: 668-677
- 852 **Widemann E, Miesch L, Lugin R, Holder E, Heinrich C, Aubert Y, Miesch M, Pinot F, Heitz T** (2013) The  
853 amidohydrolases IAR3 and ILL6 contribute to jasmonoyl-isoleucine hormone turnover and  
854 generate 12-hydroxyjasmonic acid upon wounding in *Arabidopsis* leaves. *Journal of Biological  
855 Chemistry* **288**: 31701-31714
- 856 **Wilkins O, Nahal H, Foong J, Provart NJ, Campbell MM** (2009) Expansion and diversification of the  
857 *Populus* R2R3-MYB family of transcription factors. *Plant Physiology* **149**: 981-993
- 858 **Xue L-J, Alabady MS, Mohebbi M, Tsai C-J** (2015) Exploiting genome variation to improve next-  
859 generation sequencing data analysis and genome editing efficiency in *Populus tremula* x *alba*  
860 717-1B4. *Tree Genetics & Genomes* **11**: 82

- 861 **Xue LJ, Tsai CJ** (2015) AGESeq: Analysis of genome editing by sequencing. *Molecular Plant* **8**: 1428-1430
- 862 **Zhang B, Hülskamp M** (2019) Evolutionary analysis of MBW function by phenotypic rescue in
- 863 *Arabidopsis thaliana*. *Frontiers in Plant Science* **10**
- 864 **Zhang F, Gonzalez A, Zhao M, Payne CT, Lloyd A** (2003) A network of redundant bHLH proteins
- 865 functions in all TTG1-dependent pathways of *Arabidopsis*. *Development* **130**: 4859-4869
- 866 **Zhao M, Morohashi K, Hatlestad G, Grotewold E, Lloyd A** (2008) The TTG1-bHLH-MYB complex controls
- 867 trichome cell fate and patterning through direct targeting of regulatory loci. *Development* **135**:
- 868 1991-1999
- 869 **Zhou X, Jacobs TB, Xue L-J, Harding SA, Tsai C-J** (2015) Exploiting SNPs for biallelic CRISPR mutations in
- 870 the outcrossing woody perennial *Populus* reveals 4-coumarate:CoA ligase specificity and
- 871 redundancy. *New Phytologist* **208**: 298-301
- 872 **Zwaenepoel A, Van de Peer Y** (2018) wgd—simple command line tools for the analysis of ancient whole-
- 873 genome duplications. *Bioinformatics* **35**: 2153-2155
- 874

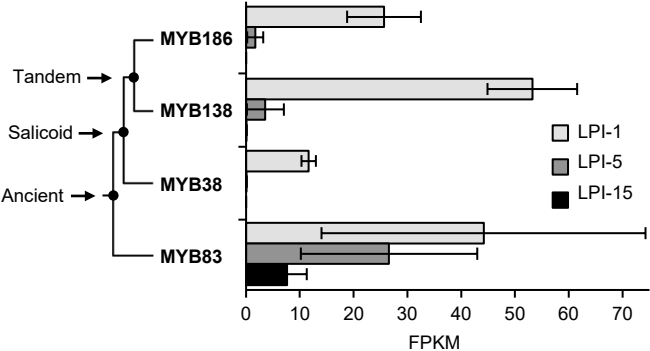

**Figure 1.** Expression of clade 15 *MYB* transcription factors during *Populus* leaf maturation. A simplified phylogenetic tree is shown with duplication history noted on the left. Data are mean  $\pm$  SD of  $n=3$ . LPI, leaf plastochron index; FPKM, fragments per kilobase of transcript per million mapped reads; MYB186, Potri.008G089200; MYB138, Potri.008G089700; MYB38, Potri.010G165700; and MYB83, Potri.017G086300.



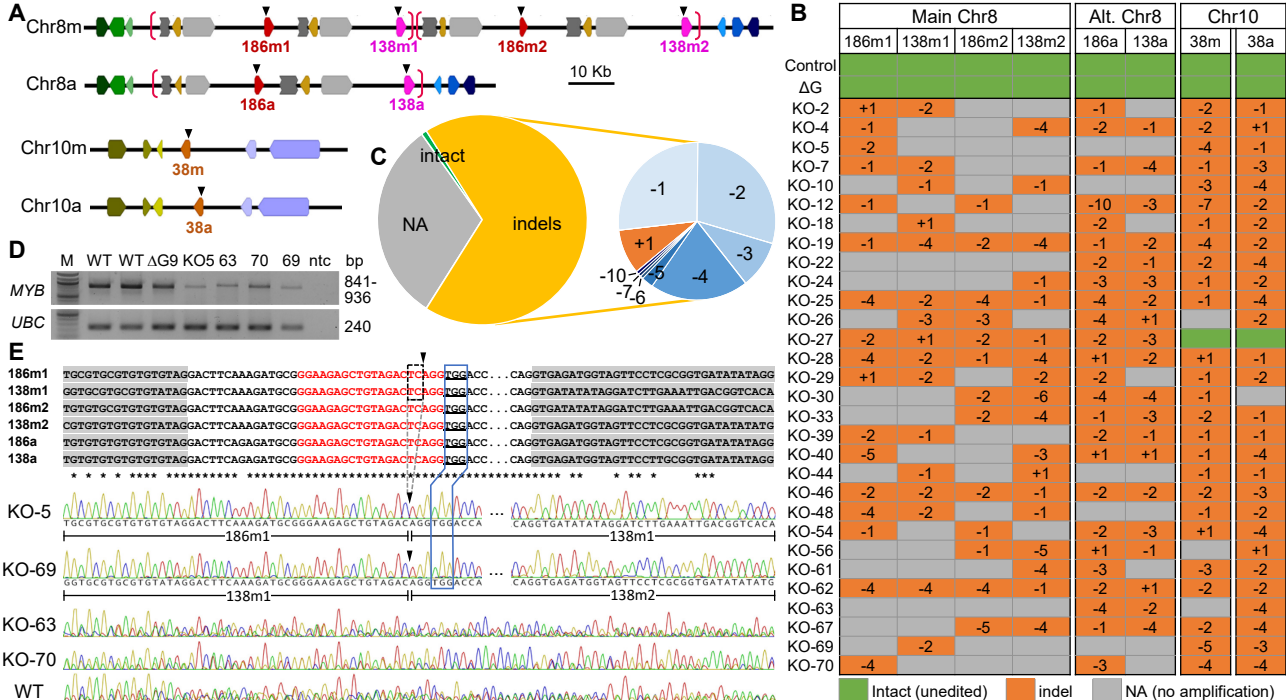

**Figure 3.** Mutation analysis of trichomeless mutants. **A**, Schematic illustration of *MYB186* and *MYB138* on Chr8 subgenomes (main and alternative, or Chr8m and Chr8a, respectively) and *MYB38* on Chr10m and Chr10a of the 717 genome. Neighboring genes are color coded for synteny and the putative duplication block containing *MYB186* and *MYB138* on Chr8 is marked by red brackets. Black triangles denote the eight gRNA target sites. **B**, Mutation spectrum determined by amplicon sequencing. The eight alleles are arranged by genomic position for each plant line and color-coded for the editing outcomes: green, unedited (intact); orange, indel; and grey, no amplification (NA). **C**, Pie chart summary of the overall (left) and indel (right) editing patterns. **D**, PCR amplification of the six *MYB* alleles on Chr8 from two WT, one ΔG and four KO lines. The four KO lines were selected to represent one (KO-5 and KO-69) or two (KO-63 and KO-70) remaining Chr08 alleles. *UBC* (ubiquitin-conjugating enzyme) was included as loading control. M, molecular weight marker; ntc, no-template control. **E**, Sanger sequencing of PCR products from D. Sequence alignment of the six alleles flanking the gRNA target site (red) is shown on top and chromatograms of the same region are shown below. Grey shaded regions are introns and PAM is underlined and boxed in blue for correspondence with the sequence traces below. Black triangles denote the Cas9 cleavage site and black dashed box corresponds to the 2-bp deletion (-2) detected in KO-5 and KO-69. The two fusion alleles as determined by SNPs are marked below the KO-5 and KO-69 traces (see Supplemental Figure S2 for the full sequence alignment).

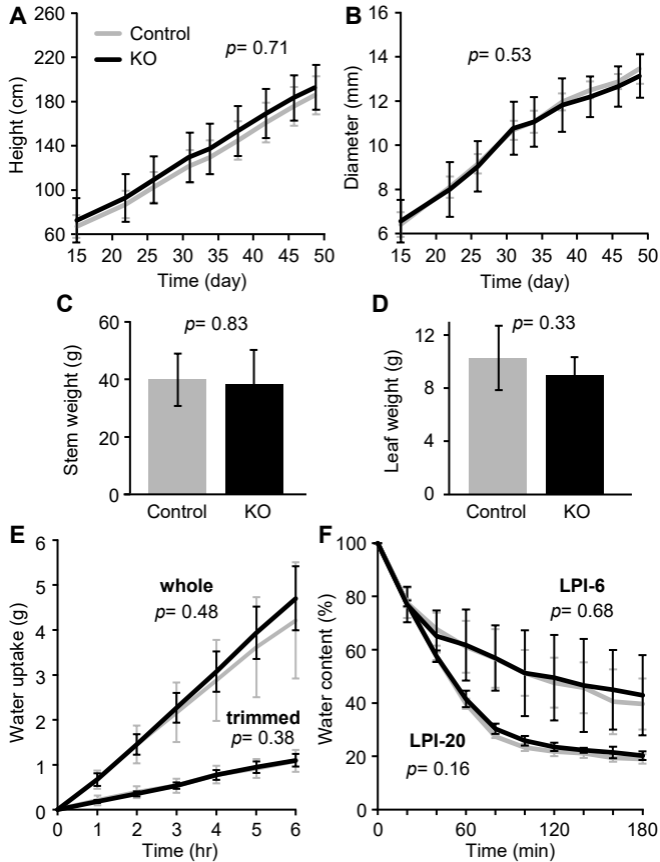

**Figure 4.** Phenotypic characterization of trichomeless KO mutants. **A-B**, Height (A) and diameter (B) growth monitored over seven weeks. **C-D**, Stem (C) and leaf (D) biomass at harvest. Only LPI31-LPI40 were used for leaf biomass. **E**, Transpiration-driven water uptake of size-matched whole leaves or leaves trimmed with stencil to control for surface area. **F**, Water loss during drying of leaves LPI-6 and LPI-20. Data are mean  $\pm$  SD of  $n=5-7$  controls (WT and transgenic controls) or KO mutants grown in a greenhouse (A-D, F) or in a growth chamber (E).  $P$  values were determined using repeated measures ANOVA (A-B, E-F) or 2-tailed  $t$ -test (C-D).

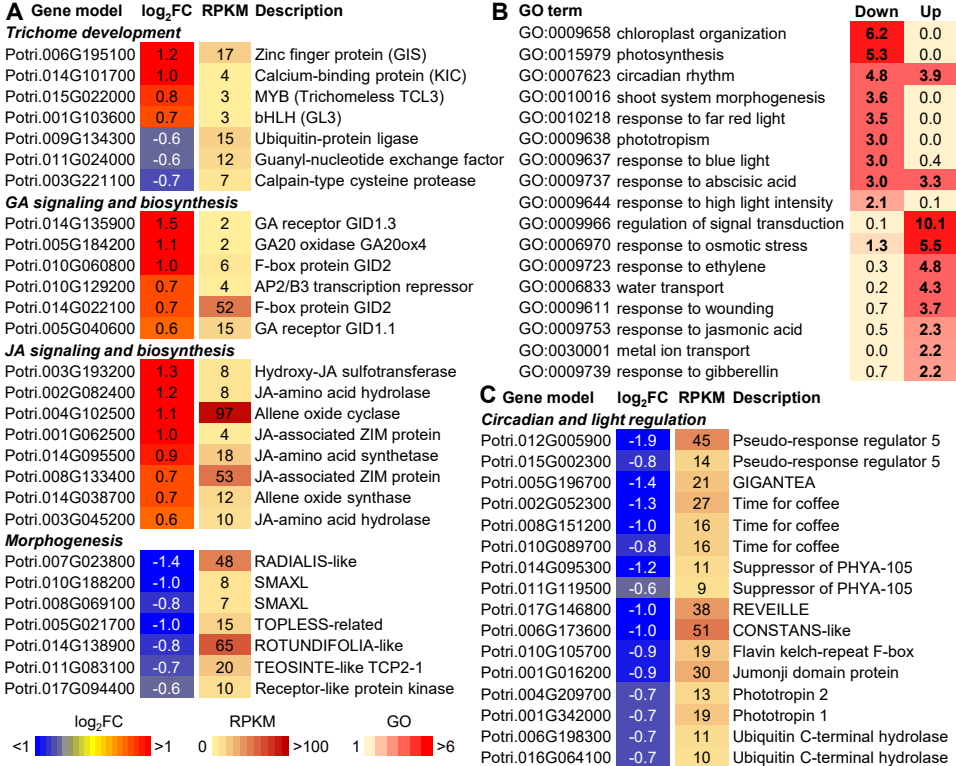

**Figure 5.** Transcriptional responses of trichomeless leaves. **A**, Expression response heatmaps of genes involved in trichome development, biosynthesis and signaling of GA and JA signaling and morphogenesis. **B**, Gene Ontology (GO) enrichment analysis of genes differentially up- or down-regulated in trichomeless leaves related to the control. Representative GO terms are visualized by the negative log<sub>10</sub>-transformed *P* values, with the color scales shown at the bottom. Bolded values indicate *P*<0.05). **C**, Expression heatmaps of genes involved in regulation of circadian rhythm and light responses. Expression responses in A and C are shown in log<sub>2</sub>-transformed fold-change (FC, mutant/control) and visualized according to the color scales at the bottom. Average basal expression levels from control samples are shown in RPKM (reads per kilobase of transcript per million mapped reads) and visualized according to the color scales at the bottom.

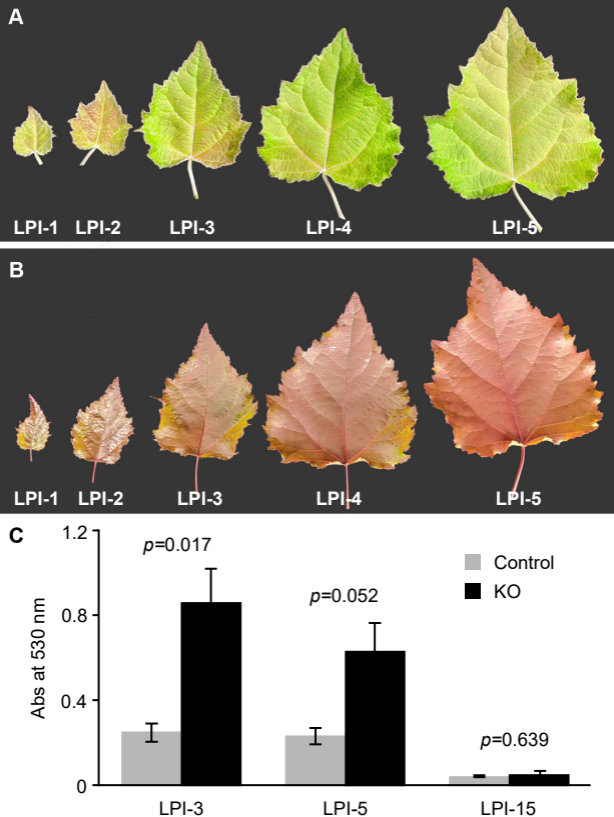

**Figure 6.** Anthocyanin accumulation under high light conditions. **A-B**, Representative examples of LPI-1 to LPI-5 from a Cas9 vector control plant (A) or a trichomeless mutant (B). **C**, Anthocyanin contents of LPI-3, LPI-5 and LPI-15. Data are mean $\pm$ SD of  $n=6$  control or  $n=10$  KO plants. *P* values were determined using 2-tailed *t*-test.



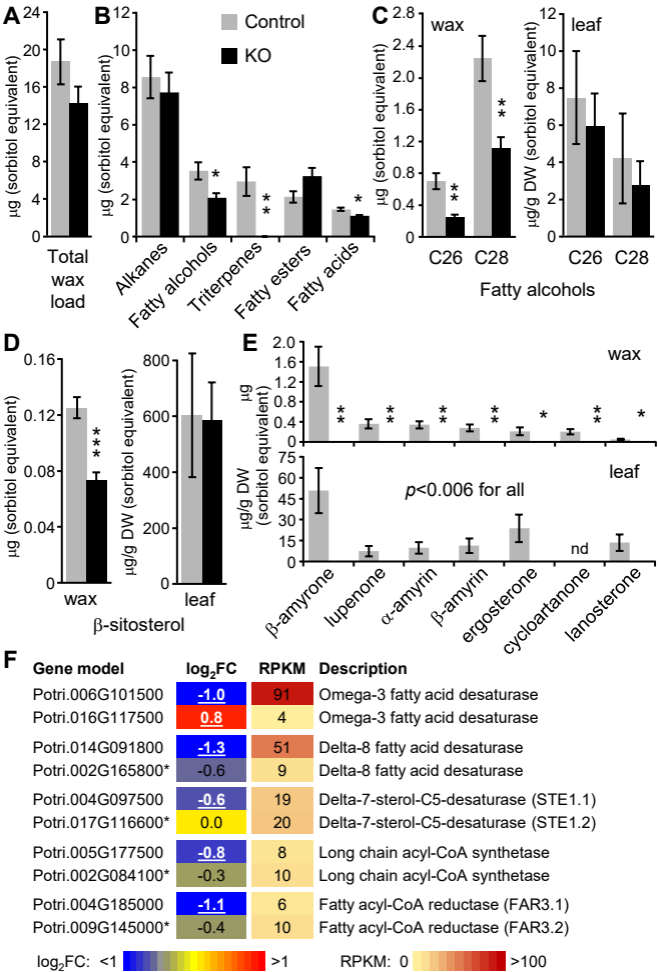

**Figure 7.** Cuticular wax composition of trichomeless and control leaves. **A**, Total wax load. **B**, Major classes of cuticle wax. **C**, Fatty alcohols (C26, 1-hexacosanol; C28, 1-octacosanol) detected in wax (left) or whole leaves (right). **D**,  $\beta$ -sitosterol detected in wax (left) or whole leaves (right). **E**, Triterpenes detected in wax (top) or whole leaves (bottom). Ergosterone, 14,24-dimethyl-ergosta-8,25-dien-3-one; cycloartanone, 24-methylene cycloartan-3-one; lanosterone, lanosta-8,24-dien-3-one. Data are mean $\pm$ SD of n=5. All concentration estimates were based on sorbitol equivalent. Statistical significance was determined by 2-tailed *t*-test (\*  $P < 0.05$ , \*\*  $P < 0.01$ , \*\*\*  $P < 0.001$ ). nd, not detected. **F**, Expression response heatmaps of genes involved in fatty acid and wax biosynthesis. Data presentation is the same as in Figure 5.

## Parsed Citations

**Alexa A, Rahnenfuhrer J (2010) topGO: Enrichment Analysis for Gene Ontology. R package version 2.0.**

Google Scholar: [Author Only Title Only Author and Title](#)

**Bewg WP, Ci D, Tsai CJ (2018) Genome editing in trees: From multiple repair pathways to long-term stability. *Frontiers in Plant Science* 9: 1732**

Google Scholar: [Author Only Title Only Author and Title](#)

**Bickford CP (2016) Ecophysiology of leaf trichomes. *Functional Plant Biology* 43: 807-814**

Google Scholar: [Author Only Title Only Author and Title](#)

**Briggs WR, Beck CF, Cashmore AR, Christie JM, Hughes J, Jarillo JA, Kagawa T, Kanegae H, Liscum E, Nagatani A, Okada K, Salomon M, Rüdiger W, Sakai T, Takano M, Wada M, Watson JC (2001) The phototropin family of photoreceptors. *Plant Cell* 13: 993-997**

Google Scholar: [Author Only Title Only Author and Title](#)

**Catchen JM, Amores A, Hohenlohe P, Cresko W, Postlethwait JH (2011) Stacks: Building and genotyping loci de novo from short-read sequences. *Genes Genomes Genetics* 1: 171-182**

Google Scholar: [Author Only Title Only Author and Title](#)

**Cheng Y, Wang L, Abbas M, Huang X, Wang Q, Wu A, Wei H, Peng S, Dai X, Li Q (2021) MicroRNA319-mediated gene regulatory network impacts leaf development and morphogenesis in poplar. *Forestry Research* 1: 4**

Google Scholar: [Author Only Title Only Author and Title](#)

**Dellaporta SL, Wood J, Hicks JB (1983) A plant DNA miniprep: Version II. *Plant Molecular Biology Reporter* 1: 19-21**

Google Scholar: [Author Only Title Only Author and Title](#)

**Dobin A, Gingeras TR (2015) Mapping RNA-seq reads with STAR. *Curr Protoc Bioinformatics* 51: 11.14.11-11.14.19**

Google Scholar: [Author Only Title Only Author and Title](#)

**dos Santos Tozin LR, de Melo Silva SC, Rodrigues TM (2016) Non-glandular trichomes in Lamiaceae and Verbenaceae species: Morphological and histochemical features indicate more than physical protection. *New Zealand Journal of Botany* 54: 446-457**

Google Scholar: [Author Only Title Only Author and Title](#)

**Downes BP, Stupar RM, Gingerich DJ, Vierstra RD (2003) The HECT ubiquitin-protein ligase (UPL) family in Arabidopsis: UPL3 has a specific role in trichome development. *Plant Journal* 35: 729-742**

Google Scholar: [Author Only Title Only Author and Title](#)

**Falginella L, Andre CM, Legay S, Lin-Wang K, Dare AP, Deng C, Rebstock R, Plunkett BJ, Guo L, Cipriani G, Espley RV (2021) Differential regulation of triterpene biosynthesis induced by an early failure in cuticle formation in apple. *Horticulture Research* 8: 75**

Google Scholar: [Author Only Title Only Author and Title](#)

**Fambrini M, Pugliesi C (2019) The dynamic genetic-hormonal regulatory network controlling the trichome development in leaves. *Plants* 8: 253**

Google Scholar: [Author Only Title Only Author and Title](#)

**Filichkin SA, Breton G, Priest HD, Dharmawardhana P, Jaiswal P, Fox SE, Michael TP, Chory J, Kay SA, Mockler TC (2011) Global profiling of rice and poplar transcriptomes highlights key conserved circadian-controlled pathways and cis-regulatory modules. *PLoS One* 6: e16907**

Google Scholar: [Author Only Title Only Author and Title](#)

**Folkers U, Berger J, Hülskamp M (1997) Cell morphogenesis of trichomes in Arabidopsis: Differential control of primary and secondary branching by branch initiation regulators and cell growth. *Development* 124: 3779-3786**

Google Scholar: [Author Only Title Only Author and Title](#)

**Gachotte D, Meens R, Benveniste P (1995) An Arabidopsis mutant deficient in sterol biosynthesis: Heterologous complementation by ERG 3 encoding a  $\Delta 7$ -sterol-C-5-desaturase from yeast. *Plant Journal* 8: 407-416**

Google Scholar: [Author Only Title Only Author and Title](#)

**Galletti R, Johnson KL, Scofield S, San-Bento R, Watt AM, Murray JA, Ingram GC (2015) DEFECTIVE KERNEL 1 promotes and maintains plant epidermal differentiation. *Development* 142: 1978-1983**

Google Scholar: [Author Only Title Only Author and Title](#)

**Gan Y, Kumimoto R, Liu C, Ratcliffe O, Yu H, Broun P (2006) GLABROUS INFLORESCENCE STEMS modulates the regulation by gibberellins of epidermal differentiation and shoot maturation in Arabidopsis. *Plant Cell* 18: 1383-1395**

Google Scholar: [Author Only Title Only Author and Title](#)

**Gilding EK, Marks MD (2010) Analysis of purified glabra3-shapeshifter trichomes reveals a role for NOECK in regulating early trichome morphogenic events. *Plant Journal* 64: 304-317**

Google Scholar: [Author Only Title Only Author and Title](#)

**Glover BJ, Perez-Rodriguez M, Martin C (1998) Development of several epidermal cell types can be specified by the same MYB-related plant transcription factor. *Development* 125: 3497-3508**

Google Scholar: [Author Only](#) [Title Only](#) [Author and Title](#)

**Hall A, Bastow RM, Davis SJ, Hanano S, McWatters HG, Hibberd V, Doyle MR, Sung S, Halliday KJ, Amasino RM, Millar AJ (2003) The TIME FOR COFFEE gene maintains the amplitude and timing of Arabidopsis circadian clocks. Plant Cell 15: 2719-2729**

Google Scholar: [Author Only](#) [Title Only](#) [Author and Title](#)

**Hamaguchi A, Yamashino T, Koizumi N, Kiba T, Kojima M, Sakakibara H, Mizuno T (2008) A small subfamily of Arabidopsis RADIALIS-LIKE SANT/MYB genes: A link to HOOKLESS1-mediated signal transduction during early morphogenesis. Bioscience, Biotechnology, and Biochemistry 72: 2687-2696**

Google Scholar: [Author Only](#) [Title Only](#) [Author and Title](#)

**Hegebarth D, Buschhaus C, Wu M, Bird D, Jetter R (2016) The composition of surface wax on trichomes of Arabidopsis thaliana differs from wax on other epidermal cells. Plant Journal 88: 762-774**

Google Scholar: [Author Only](#) [Title Only](#) [Author and Title](#)

**Holwerda EK, Thorne PG, Olson DG, Amador-Noguez D, Engle NL, Tschaplinski TJ, van Dijken JP, Lynd LR (2014) The exometabolome of Clostridium thermocellum reveals overflow metabolism at high cellulose loading. Biotechnology for Biofuels 7: 155**

Google Scholar: [Author Only](#) [Title Only](#) [Author and Title](#)

**Hülkamp M (2004) Plant trichomes: A model for cell differentiation. Nature Reviews: Molecular Cell Biology 5: 471-480**

Google Scholar: [Author Only](#) [Title Only](#) [Author and Title](#)

**Imaizumi T, Tran HG, Swartz TE, Briggs WR, Kay SA (2003) FKF1 is essential for photoperiodic-specific light signalling in Arabidopsis. Nature 426: 302-306**

Google Scholar: [Author Only](#) [Title Only](#) [Author and Title](#)

**Jacobs TB, LaFayette PR, Schmitz RJ, Parrott WA (2015) Targeted genome modifications in soybean with CRISPR/Cas9. BMC Biotechnology 15: 16**

Google Scholar: [Author Only](#) [Title Only](#) [Author and Title](#)

**Jakoby MJ, Falkenhan D, Mader MT, Brininstool G, Wischnitzki E, Platz N, Hudson A, Hülkamp M, Larkin J, Schnittger A (2008) Transcriptional profiling of mature Arabidopsis trichomes reveals that NOECK encodes the MIXTA-like transcriptional regulator MYB106. Plant Physiology 148: 1583-1602**

Google Scholar: [Author Only](#) [Title Only](#) [Author and Title](#)

**Jones MA, Covington MF, DiTacchio L, Vollmers C, Panda S, Harmer SL (2010) Jumonji domain protein JMJD5 functions in both the plant and human circadian systems. Proc Natl Acad Sci U S A 107: 21623-21628**

Google Scholar: [Author Only](#) [Title Only](#) [Author and Title](#)

**Karabourniotis G, Liakopoulos G, Nikolopoulos D, Bresta P (2020) Protective and defensive roles of non-glandular trichomes against multiple stresses: Structure–function coordination. Journal of Forestry Research 31: 1-12**

Google Scholar: [Author Only](#) [Title Only](#) [Author and Title](#)

**Koncz C, Schell J (1986) The promoter of TL-DNA gene 5 controls the tissue-specific expression of chimaeric genes carried by a novel type of Agrobacterium binary vector. Molecular & General Genetics 204: 383-396**

Google Scholar: [Author Only](#) [Title Only](#) [Author and Title](#)

**Lange BM, Srividya N (2019) Enzymology of monoterpene functionalization in glandular trichomes. Journal of Experimental Botany 70: 1095-1108**

Google Scholar: [Author Only](#) [Title Only](#) [Author and Title](#)

**Lange BM, Turner GW (2013) Terpenoid biosynthesis in trichomes - Current status and future opportunities. Plant Biotechnology Journal 11: 2-22**

Google Scholar: [Author Only](#) [Title Only](#) [Author and Title](#)

**Larkin JC, Brown ML, Schiefelbein J (2003) How do cells know what they want to be when they grow up? Lessons from epidermal patterning in Arabidopsis. Annual Review of Plant Biology 54: 403-430**

Google Scholar: [Author Only](#) [Title Only](#) [Author and Title](#)

**Liakopoulos G, Nikolopoulos D, Klouvatou A, Vekkos KA, Manetas Y, Karabourniotis G (2006) The photoprotective role of epidermal anthocyanins and surface pubescence in young leaves of grapevine (Vitis vinifera). Annals of Botany 98: 257-265**

Google Scholar: [Author Only](#) [Title Only](#) [Author and Title](#)

**Liao Y, Smyth GK, Shi W (2014) featureCounts: an efficient general purpose program for assigning sequence reads to genomic features. Bioinformatics 30: 923-930**

Google Scholar: [Author Only](#) [Title Only](#) [Author and Title](#)

**Long JA, Ohno C, Smith ZR, Meyerowitz EM (2006) TOPLESS regulates apical embryonic fate in Arabidopsis. Science 312: 1520-1523**

Google Scholar: [Author Only](#) [Title Only](#) [Author and Title](#)

**Love M, Huber W, Anders S (2014) Moderated estimation of fold change and dispersion for RNA-seq data with DESeq2. Genome Biology 15: 550**

Google Scholar: [Author Only](#) [Title Only](#) [Author and Title](#)

**Machado A, Wu Y, Yang Y, Llewellyn DJ, Dennis ES (2009) The MYB transcription factor GhMYB25 regulates early fibre and trichome development. The Plant Journal 59: 52-62**

Google Scholar: [Author Only Title Only Author and Title](#)

**Maes L, Goossens A (2010) Hormone-mediated promotion of trichome initiation in plants is conserved but utilizes species- and trichome-specific regulatory mechanisms. Plant Signaling & Behavior 5: 205-207**

Google Scholar: [Author Only Title Only Author and Title](#)

**Maes L, Inzé D, Goossens A (2008) Functional specialization of the TRANSPARENT TESTA GLABRA1 network allows differential hormonal control of laminal and marginal trichome initiation in Arabidopsis rosette leaves. Plant Physiol 148: 1453-1464**

Google Scholar: [Author Only Title Only Author and Title](#)

**Matías-Hernández L, Aguilar-Jaramillo AE, Cigliano RA, Sanseverino W, Pelaz S (2016) Flowering and trichome development share hormonal and transcription factor regulation. Journal of Experimental Botany 67: 1209-1219**

Google Scholar: [Author Only Title Only Author and Title](#)

**Matsushika A, Makino S, Kojima M, Mizuno T (2000) Circadian waves of expression of the APRR1/TOC1 family of pseudo-response regulators in Arabidopsis thaliana: Insight into the plant circadian clock. Plant Cell Physiology 41: 1002-1012**

Google Scholar: [Author Only Title Only Author and Title](#)

**Mauriat M, Moritz T (2009) Analyses of GA20ox- and GID1-over-expressing aspen suggest that gibberellins play two distinct roles in wood formation. Plant Journal 58: 989-1003**

Google Scholar: [Author Only Title Only Author and Title](#)

**Meilan R, Ma C (2006) Poplar (Populus spp.). In K Wang, ed, Agrobacterium Protocols Volume 2. Methods in Molecular Biology, Vol 344. Humana Press, Totowa, NJ**

Google Scholar: [Author Only Title Only Author and Title](#)

**Narita NN, Moore S, Horiguchi G, Kubo M, Demura T, Fukuda H, Goodrich J, Tsukaya H (2004) Overexpression of a novel small peptide ROTUNDIFOLIA4 decreases cell proliferation and alters leaf shape in Arabidopsis thaliana. Plant Journal 38: 699-713**

Google Scholar: [Author Only Title Only Author and Title](#)

**Neff MM, Chory J (1998) Genetic interactions between Phytochrome A, Phytochrome B, and Cryptochrome 1 during Arabidopsis development. Plant Physiology 118: 27-36**

Google Scholar: [Author Only Title Only Author and Title](#)

**Ni M (2005) Integration of light signaling with photoperiodic flowering and circadian rhythm. Cell Research 15: 559-566**

Google Scholar: [Author Only Title Only Author and Title](#)

**Oppenheimer DG, Pollock MA, Vacik J, Szymanski DB, Ericson B, Feldmann K, Marks MD (1997) Essential role of a kinesin-like protein in Arabidopsis trichome morphogenesis. Proceedings of the National Academy of Sciences of the United States of America 94: 6261-6266**

Google Scholar: [Author Only Title Only Author and Title](#)

**Oshima Y, Shikata M, Koyama T, Ohtsubo N, Mitsuda N, Ohme-Takagi M (2013) MIXTA-like transcription factors and WAX INDUCER1/SHINE1 coordinately regulate cuticle development in Arabidopsis and Torenia fournieri. Plant Cell 25: 1609-1624**

Google Scholar: [Author Only Title Only Author and Title](#)

**Park DH, Somers DE, Kim YS, Choy YH, Lim HK, Soh MS, Kim HJ, Kay SA, Nam HG (1999) Control of circadian rhythms and photoperiodic flowering by the Arabidopsis GIGANTEA gene. Science 285: 1579-1582**

Google Scholar: [Author Only Title Only Author and Title](#)

**Payne VW (1978) A glossary of plant hair terminology. Brittonia 30: 239-255**

Google Scholar: [Author Only Title Only Author and Title](#)

**Plett JM, Wilkins O, Campbell MM, Ralph SG, Regan S (2010) Endogenous overexpression of Populus MYB186 increases trichome density, improves insect pest resistance, and impacts plant growth. Plant Journal 64: 419-432**

Google Scholar: [Author Only Title Only Author and Title](#)

**Qi T, Song S, Ren Q, Wu D, Huang H, Chen Y, Fan M, Peng W, Ren C, Xie D (2011) The Jasmonate-ZIM-domain proteins interact with the WD-Repeat/bHLH/MYB complexes to regulate jasmonate-mediated anthocyanin accumulation and trichome initiation in Arabidopsis thaliana. Plant Cell 23: 1795-1814**

Google Scholar: [Author Only Title Only Author and Title](#)

**Qiu JL, Jilk R, Marks MD, Szymanski DB (2002) The Arabidopsis SPIKE1 gene is required for normal cell shape control and tissue development. Plant Cell 14: 101-118**

Google Scholar: [Author Only Title Only Author and Title](#)

**Ramsay NA, Glover BJ (2005) MYB-bHLH-WD40 protein complex and the evolution of cellular diversity. Trends in Plant Science 10: 63-70**

Google Scholar: [Author Only Title Only Author and Title](#)

**Reddy VS, Day IS, Thomas T, Reddy AS (2004) KIC, a novel Ca<sup>2+</sup> binding protein with one EF-hand motif, interacts with a microtubule motor protein and regulates trichome morphogenesis. Plant Cell 16: 185-200**

Google Scholar: [Author Only](#) [Title Only](#) [Author and Title](#)

**Rowland O, Zheng H, Hepworth SR, Lam P, Jetter R, Kunst L (2006) CER4 encodes an alcohol-forming fatty acyl-coenzyme A reductase involved in cuticular wax production in Arabidopsis. Plant Physiology 142: 866-877**

Google Scholar: [Author Only](#) [Title Only](#) [Author and Title](#)

**Schuepp PH (1993) Leaf boundary layers. New Phytologist 125: 477-507**

Google Scholar: [Author Only](#) [Title Only](#) [Author and Title](#)

**Schuurink R, Tissier A (2020) Glandular trichomes: Micro-organs with model status? New Phytologist 225: 2251-2266**

Google Scholar: [Author Only](#) [Title Only](#) [Author and Title](#)

**Smillie RM, Hetherington SE (1999) Photoabatement by anthocyanin shields photosynthetic systems from light stress. Photosynthetica 36: 451-463**

Google Scholar: [Author Only](#) [Title Only](#) [Author and Title](#)

**Soetaert SSA, Van Neste CMF, Vandewoestyne ML, Head SR, A G, Van Nieuwerburgh FCW, Deforce DLD (2013) Differential transcriptome analysis of glandular and filamentous trichomes in Artemisia annua. BMC Plant Biology 13: 220**

Google Scholar: [Author Only](#) [Title Only](#) [Author and Title](#)

**Soundappan I, Bennett T, Morffy N, Liang Y, Stanga JP, Abbas A, Leyser O, Nelson DC (2015) SMAX1-LIKE/D53 family members enable distinct MAX2-dependent responses to strigolactones and karrikins in Arabidopsis. Plant Cell 27: 3143-3159**

Google Scholar: [Author Only](#) [Title Only](#) [Author and Title](#)

**Tao Q, Guo D, Wei B, Zhang F, Pang C, Jiang H, Zhang J, Wei T, Gu H, Qu LJ, Qin G (2013) The TIE1 transcriptional repressor links TCP transcription factors with TOPLESS/TOPLESS-RELATED corepressors and modulates leaf development in Arabidopsis. Plant Cell 25: 421-437**

Google Scholar: [Author Only](#) [Title Only](#) [Author and Title](#)

**Thimmappa R, Geisler K, Louveau T, O'Maille P, Osbourn A (2014) Triterpene biosynthesis in plants. Annual Review of Plant Biology 65: 225-257**

Google Scholar: [Author Only](#) [Title Only](#) [Author and Title](#)

**Tuskan GA, DiFazio S, Jansson S, Bohlmann J, Grigoriev I, Hellsten U, Putnam N, Ralph S, Rombauts S, Salamov A, Schein J, Sterck L, Aerts A, Bhalerao RR, Bhalerao RP, Blaudez D, Boerjan W, Brun A, Brunner A, Busov V, Campbell M, Carlson J, Chalot M, Chapman J, Chen GL, Cooper D, Coutinho PM, Couturier J, Covert S, Cronk Q, Cunningham R, Davis J, Degroeve S, Dejardin A, dePamphilis C, Detter J, Dirks B, Dubchak I, Duplessis S, Ehling J, Ellis B, Gendler K, Goodstein D, Gribkov M, Grimwood J, Groover A, Gunter L, Hamberger B, Heinze B, Helariutta Y, Henrissat B, Holligan D, Holt R, Huang W, Islam-Faridi N, Jones S, Jones-Rhoades M, Jorgensen R, Joshi C, Kangasjarvi J, Karlsson J, Kelleher C, Kirkpatrick R, Kirst M, Kohler A, Kalluri U, Larimer F, Leebens-Mack J, Leple JC, Locascio P, Lou Y, Lucas S, Martin F, Montanini B, Napoli C, Nelson DR, Nelson C, Nieminen K, Nilsson O, Pereda V, Peter G, Philippe R, Pilate G, Poliakov A, Razumovskaya J, Richardson P, Rinaldi C, Ritland K, Rouze P, Ryabov D, Schmutz J, Schrader J, Segerman B, Shin H, Siddiqui A, Sterky F, Terry A, Tsai CJ, Uberbacher E, Unneberg P, Vahala J, Wall K, Wessler S, Yang G, Yin T, Douglas C, Marra M, Sandberg G, Van de Peer Y, Rokhsar D (2006) The genome of black cottonwood, Populus trichocarpa (Torr. & Gray). Science 313: 1596-1604**

Google Scholar: [Author Only](#) [Title Only](#) [Author and Title](#)

**Walker AR, Davison PA, Bolognesi-Winfield AC, James CM, Srinivasan N, Blundell TL, Esch JJ, Marks MD, Gray JC (1999) The TRANSPARENT TESTA GLABRA1 locus, which regulates trichome differentiation and anthocyanin biosynthesis in Arabidopsis, encodes a WD40 repeat protein. Plant Cell 11: 1337-1349**

Google Scholar: [Author Only](#) [Title Only](#) [Author and Title](#)

**Wang B, Luo Q, Li Y, Yin L, Zhou N, Li X, Gan J, Dong A (2020) Structural insights into target DNA recognition by R2R3-MYB transcription factors. Nucleic Acids Research 48: 460-471**

Google Scholar: [Author Only](#) [Title Only](#) [Author and Title](#)

**Wang H-Q, Tuominen LK, Tsai C-J (2011) SLIM: A sliding linear model for estimating the proportion of true null hypotheses in datasets with dependence structures. Bioinformatics 27: 225-231**

Google Scholar: [Author Only](#) [Title Only](#) [Author and Title](#)

**Wang S, Chen J-G (2014) Regulation of cell fate determination by single-repeat R3 MYB transcription factors in Arabidopsis. Frontiers in Plant Science 5**

Google Scholar: [Author Only](#) [Title Only](#) [Author and Title](#)

**Wang S, Chen JG (2014) Regulation of cell fate determination by single-repeat R3 MYB transcription factors in Arabidopsis. Frontiers in Plant Science 5: 133**

Google Scholar: [Author Only](#) [Title Only](#) [Author and Title](#)

**Wang W, Wang Y, Zhang Q, Qi Y, Guo D (2009) Global characterization of Artemisia annua glandular trichome transcriptome using 454 pyrosequencing. BMC Genomics 10: 465**

Google Scholar: [Author Only](#) [Title Only](#) [Author and Title](#)

**Wen J, Lease KA, Walker JC (2004) DVL, a novel class of small polypeptides: Overexpression alters Arabidopsis development. Plant Journal 37: 668-677**

Google Scholar: [Author Only](#) [Title Only](#) [Author and Title](#)

**Widemann E, Miesch L, Lugan R, Holder E, Heinrich C, Aubert Y, Miesch M, Pinot F, Heitz T (2013) The amidohydrolases IAR3 and ILL6 contribute to jasmonoyl-isoleucine hormone turnover and generate 12-hydroxyjasmonic acid upon wounding in Arabidopsis leaves. Journal of Biological Chemistry 288: 31701-31714**

Google Scholar: [Author Only](#) [Title Only](#) [Author and Title](#)

**Wilkins O, Nahal H, Foong J, Provart NJ, Campbell MM (2009) Expansion and diversification of the Populus R2R3-MYB family of transcription factors. Plant Physiology 149: 981-993**

Google Scholar: [Author Only](#) [Title Only](#) [Author and Title](#)

**Xue L-J, Alabady MS, Mohebbi M, Tsai C-J (2015) Exploiting genome variation to improve next-generation sequencing data analysis and genome editing efficiency in Populus tremula x alba 717-1B4. Tree Genetics & Genomes 11: 82**

Google Scholar: [Author Only](#) [Title Only](#) [Author and Title](#)

**Xue LJ, Tsai CJ (2015) AGEseq: Analysis of genome editing by sequencing. Molecular Plant 8: 1428-1430**

Google Scholar: [Author Only](#) [Title Only](#) [Author and Title](#)

**Zhang B, Hülkamp M (2019) Evolutionary analysis of MBW function by phenotypic rescue in Arabidopsis thaliana. Frontiers in Plant Science 10**

Google Scholar: [Author Only](#) [Title Only](#) [Author and Title](#)

**Zhang F, Gonzalez A, Zhao M, Payne CT, Lloyd A (2003) A network of redundant bHLH proteins functions in all TTG1-dependent pathways of Arabidopsis. Development 130: 4859-4869**

Google Scholar: [Author Only](#) [Title Only](#) [Author and Title](#)

**Zhao M, Morohashi K, Hatlestad G, Grotewold E, Lloyd A (2008) The TTG1-bHLH-MYB complex controls trichome cell fate and patterning through direct targeting of regulatory loci. Development 135: 1991-1999**

Google Scholar: [Author Only](#) [Title Only](#) [Author and Title](#)

**Zhou X, Jacobs TB, Xue L-J, Harding SA, Tsai C-J (2015) Exploiting SNPs for biallelic CRISPR mutations in the outcrossing woody perennial Populus reveals 4-coumarate:CoA ligase specificity and redundancy. New Phytologist 208: 298-301**

Google Scholar: [Author Only](#) [Title Only](#) [Author and Title](#)

**Zwaenepoel A, Van de Peer Y (2018) wgd-simple command line tools for the analysis of ancient whole-genome duplications. Bioinformatics 35: 2153-2155**

Google Scholar: [Author Only](#) [Title Only](#) [Author and Title](#)
